# Supplementary material for: Stereoselective synthesis of the spirocyclic core of 13-desmethyl spirolide C using an aza-Claisen rearrangement and an exo-selective Diels–Alder cycloaddition
Source: Royal Society of Chemistry journal article supplement (doi:10.1039/d2ob01992b), 2023-01-01
Supplement: d2ob01992b1.pdf [file d2ob01992b1.pdf]

# Stereoselective Synthesis of the Spirocyclic Core of 13-Desmethyl Spirolide C using an aza-Claisen Rearrangement and an *exo*-selective Diels-Alder Cycloaddition

Andrew D. W. Earl,<sup>a</sup> Freda F. Li,<sup>\*a,b</sup> Chao Ma,<sup>a</sup> Daniel P. Furkert,<sup>a,b</sup> Margaret A. Brimble.<sup>\*a,b</sup>

<sup>a</sup>School of Chemical Sciences, The University of Auckland, 23 Symonds Street, Auckland 1010, New Zealand.

<sup>b</sup>Maurice Wilkins Centre for Molecular Biodiscovery, The University of Auckland, 3A Symonds Street, Auckland 1010, New Zealand.

\*Corresponding authors: [m.brimble@auckland.ac.nz](mailto:m.brimble@auckland.ac.nz), [freda.li@auckland.ac.nz](mailto:freda.li@auckland.ac.nz)

## Supporting Information

### Table of Contents

|     |                                                                                                                                                                                                                                     |
|-----|-------------------------------------------------------------------------------------------------------------------------------------------------------------------------------------------------------------------------------------|
| S2  | Synthesis of bromodiene <b>26</b>                                                                                                                                                                                                   |
| S3  | Synthesis of silyl enol ether dienes <b>32–34</b> and <b>38</b>                                                                                                                                                                     |
| S6  | Attempted Diels-Alder cycloadditions of lactams <b>27</b> and <b>28</b> with boron-substituted furans                                                                                                                               |
| S7  | <sup>1</sup> H and <sup>13</sup> C Spectra of compounds <b>8</b> , <b>15a</b> , <b>16a</b> and <b>16b</b> , <b>21–24</b> , <b>26</b> , <b>28</b> , <b>30–39</b> , <b>S1</b> , <b>S3</b> , <b>S5</b> , <b>S12</b> , and <b>S13</b> . |
| S29 | Key NOESY correlations of (±)- <b>30</b> , (±)- <b>31</b> , (±)- <b>35</b> –(±)- <b>37</b> , (±)- <b>39</b> , <b>16a</b> and <b>16b</b>                                                                                             |
| S37 | X-ray crystal structure of (±)- <b>35</b>                                                                                                                                                                                           |
| S38 | References                                                                                                                                                                                                                          |

## Synthesis of bromodiene **26**

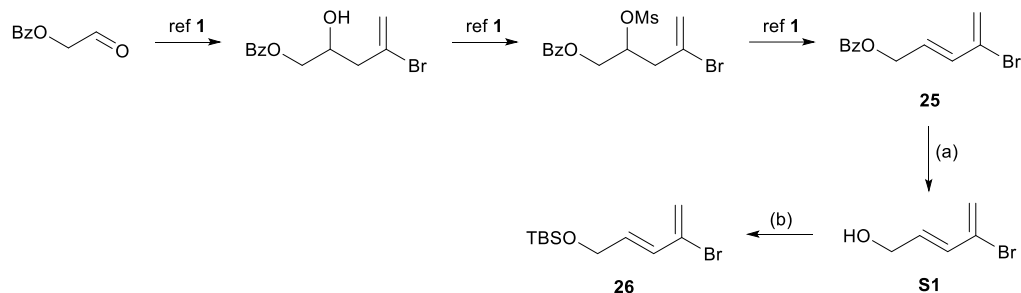

**Scheme S1.** Synthesis of bromodienes **25**<sup>[1]</sup> and **26**. *Reagents and conditions:* (a)  $\text{K}_2\text{CO}_3$ , MeOH, rt, 30 min, 90%; (b) TBSCl, imidazole,  $\text{CH}_2\text{Cl}_2$ , rt, 5 h, 92%.

## Experimental Procedures

### Alcohol **S1**

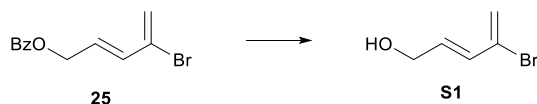

To a solution of benzoate **25**<sup>[1]</sup> (1.85 g, 6.93 mmol) in MeOH (50 mL) was added  $\text{K}_2\text{CO}_3$  (2.87 g, 20.8 mmol) at room temperature and the resulting mixture stirred for 30 min before sat. aq.  $\text{NH}_4\text{Cl}$  (25 mL) was added. The layers were separated and the aqueous layer was extracted with EtOAc ( $3 \times 50$  mL). The combined organic layers were dried over anhydrous  $\text{MgSO}_4$ , filtered, and concentrated *in vacuo*. The crude product was purified by flash column chromatography (pet. ether-Et<sub>2</sub>O, 4:1) to afford free alcohol **S1** (1.04 g, 90%) as a pale yellow oil.

**R<sub>f</sub>**: 0.26 (pet. ether-Et<sub>2</sub>O, 4:1);

$\nu_{\text{max}}/\text{cm}^{-1}$ : 3407, 1718, 1588, 1095, 955;

<sup>1</sup>H NMR (500 MHz;  $\text{CDCl}_3$ ):  $\delta$  6.29 (d,  $J = 14.9$  Hz, 1H), 6.22 (dt,  $J = 14.8, 4.7$  Hz, 1H), 5.82 (s, 1H), 5.64 (s, 1H), 4.32 (d,  $J = 3.3$  Hz, 2H), 1.54 (s, 1H);

<sup>13</sup>C NMR (125 MHz;  $\text{CDCl}_3$ ):  $\delta$  136.1, 129.4, 128.7, 120.2, 62.4;

**HRMS** (ESI<sup>+</sup>)  $m/z$ :  $[\text{M} + \text{Na}]^+$  calculated for  $\text{C}_5\text{H}_7\text{BrNaO}$ : 186.0019; found 186.0015.

### Diene **26**

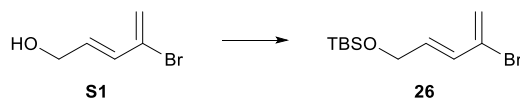

To a stirred solution of alcohol **S1** (50 mg, 0.31 mmol) and imidazole (25 mg, 0.37 mmol) in  $\text{CH}_2\text{Cl}_2$  (2 mL) was added TBSCl (56 mg, 0.37 mmol) at room temperature. The resulting mixture was stirred for 5 h before sat. aq.  $\text{NH}_4\text{Cl}$  (5 mL) was added. The layers were separated and the aqueous layer was extracted with  $\text{CH}_2\text{Cl}_2$  ( $3 \times 5$  mL). The combined organic layers were dried over anhydrous  $\text{MgSO}_4$ , filtered, and concentrated *in vacuo*.

Purification by flash chromatography (pet. ether-Et<sub>2</sub>O, 19:1) afforded silyl-protected alcohol **26** (79 mg, 92%) as a colourless oil.

**R<sub>f</sub>**: 0.52 (pet. ether-Et<sub>2</sub>O, 19:1);

$\nu_{\max}/\text{cm}^{-1}$ : 2956, 2930, 2857, 1258, 1129, 1102, 1011, 834, 802, 775;

**<sup>1</sup>H NMR** (500 MHz; CDCl<sub>3</sub>):  $\delta$  6.27 (dt,  $J = 14.7, 1.7$  Hz, 1H), 6.15 (dt,  $J = 14.6, 4.2$  Hz, 1H), 5.77 (s, 1H), 5.59 (s, 1H), 4.33–4.32 (m, 2H), 0.92 (s, 9H), 0.08 (s, 6H);

**<sup>13</sup>C NMR** (125 MHz; CDCl<sub>3</sub>):  $\delta$  136.9, 129.9, 127.4, 119.3, 62.6, 26.1, 18.6, –5.2;

**HRMS** (ESI<sup>+</sup>)  $m/z$ : [M + Na]<sup>+</sup> calculated for C<sub>11</sub>H<sub>21</sub>BrNaOSi: 299.0437; found 299.0435.

## Synthesis of silyl enol ether dienes **32–34** and **38**

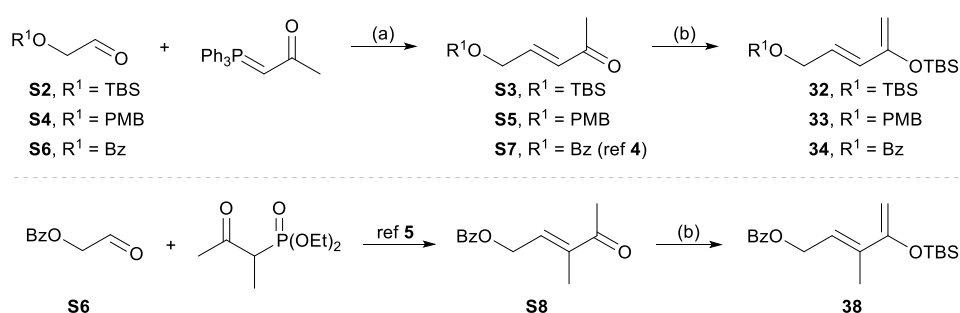

**Scheme S2.** Synthesis of silyl enol ether dienes **32–34** and **38**. *Reagents and conditions*: (a) THF, rt, 2 h, 66%–71%; (b) TBSOTf, Et<sub>3</sub>N, CH<sub>2</sub>Cl<sub>2</sub>, rt, 1–3 h, 92–98%.

## Experimental Procedures

### Enone **S3**

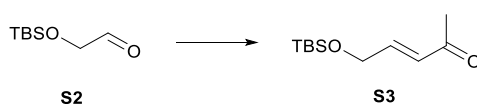

To a stirred solution of aldehyde **S2**<sup>[2]</sup> (1.00 g, 5.74 mmol) in THF (57 mL) at room temperature was added 1-(triphenylphosphoranylidene)-2-propanone (1.92 g, 6.02 mmol) and the reaction stirred for 2 h. The reaction mixture was then concentrated *in vacuo* and the crude residue was purified by flash chromatography (pet. ether-EtOAc 4:1) to afford the enone product (**S3**, 0.99 g, 71%) as a colourless oil.

**R<sub>f</sub>** = 0.64 (pet. ether-EtOAc, 7:3);

$\nu_{\max}/\text{cm}^{-1}$ : 2955, 2930, 2886, 2857, 1679, 1360, 1252, 1135, 836;

**<sup>1</sup>H NMR** (400 MHz, CDCl<sub>3</sub>):  $\delta$  6.82 (dt,  $J = 15.6, 3.6$  Hz, 1H), 6.34 (dt,  $J = 15.9, 2.1$  Hz, 1H), 4.36 (dd,  $J = 3.6, 2.2$  Hz, 2H), 2.27 (s, 3H), 0.92 (s, 9H), 0.08 (s, 6H);

**<sup>13</sup>C NMR** (100 MHz, CDCl<sub>3</sub>):  $\delta$  198.6, 146.4, 128.9, 62.3, 27.5, 26.0, 18.5, –5.3.

**HRMS** (ESI/Q-TOF)  $m/z$ : [M+Na]<sup>+</sup> calcd for C<sub>11</sub>H<sub>22</sub>NaO<sub>2</sub>Si, 237.1281; found, 237.1286.

## Enone S5

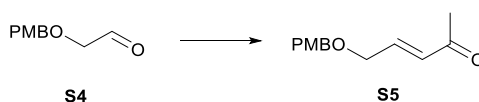

To a stirred solution of aldehyde **S4**<sup>[3]</sup> (0.500 g, 2.77 mmol) in THF (27.7 mL) at room temperature was added 1-(triphenylphosphoranylidene)-2-propanone (0.928 g, 2.91 mmol) and the reaction stirred for 2 h. The reaction mixture was then concentrated *in vacuo* and the residue was purified by flash chromatography (pet. ether-EtOAc 4:1) to afford the enone product (**S5**, 0.404 g, 66 %) as a colourless oil.

**R<sub>f</sub>** = 0.45 (pet. ether-EtOAc, 4:1);

$\nu_{\max}/\text{cm}^{-1}$ : 2937, 2912, 2838, 1674, 1611, 1513, 1247, 1032;

**<sup>1</sup>H NMR** (400 MHz, CDCl<sub>3</sub>):  $\delta$  7.28–7.25 (m, 2H), 6.90–6.88 (m, 2H), 6.79 (dt,  $J$  = 16.0, 4.5 Hz, 1H), 6.33 (dt,  $J$  = 16.0, 1.9 Hz, 1H), 4.50 (s, 2H), 4.17 (dd,  $J$  = 4.5, 1.9 Hz, 2H), 3.81 (s, 3H), 2.26 (s, 3H);

**<sup>13</sup>C NMR** (100 MHz, CDCl<sub>3</sub>):  $\delta$  198.3, 159.5, 143.3, 130.5, 129.8, 129.5, 114.0, 72.8, 68.7, 55.4, 27.4;

**HRMS** (ESI/Q-TOF)  $m/z$ : [M+Na]<sup>+</sup> calcd for C<sub>13</sub>H<sub>16</sub>NaO<sub>3</sub>, 243.0992 ; found, 243.0986.

## Diene 32

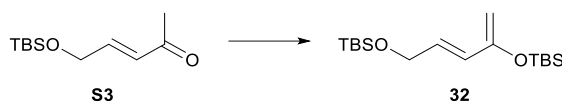

To a stirred solution of enone **S3** (0.200 g, 0.933 mmol) in CH<sub>2</sub>Cl<sub>2</sub> (9 mL) at 0 °C, was added Et<sub>3</sub>N (0.2 mL, 1.5 mmol) and TBSOTf (0.3 mL, 1.5 mmol). The resulting mixture was allowed to warm to room temperature and stirred for 1.5 h before water (9 mL) was added, the layers were separated, and the aqueous layer extracted with CH<sub>2</sub>Cl<sub>2</sub> (2 × 9 mL). The combined organic layers were dried over anhydrous Na<sub>2</sub>SO<sub>4</sub> and concentrated *in vacuo*. Purification by flash chromatography (pet. ether-Et<sub>2</sub>O 19:1, 1% Et<sub>3</sub>N) afforded the silyl enol ether product (**32**, 0.285 g, 96%) as a colourless oil.

**R<sub>f</sub>** = 0.88 (pet. ether-EtOAc, 7:3);

$\nu_{\max}/\text{cm}^{-1}$ : 2956, 2930, 2887, 2858, 1593, 1472, 1463, 1313, 1253, 1131, 1074, 1023, 963, 834, 811, 777;

**<sup>1</sup>H NMR** (400 MHz, CDCl<sub>3</sub>):  $\delta$  6.11–6.01 (m, 2H), 4.28 (s, 2H), 4.26 (d,  $J$  = 3.6 Hz, 2H), 0.97 (s, 9H), 0.91 (s, 9H), 0.18 (s, 6H), 0.07 (s, 6H);

**<sup>13</sup>C NMR** (100 MHz, CDCl<sub>3</sub>):  $\delta$  155.0, 130.1, 127.4, 95.3, 63.2, 26.1, 26.0, 18.5, 18.4, -4.5, -5.1;

**HRMS** (ESI/Q-TOF)  $m/z$ : [M+Na]<sup>+</sup> calcd for C<sub>17</sub>H<sub>36</sub>NaO<sub>2</sub>Si<sub>2</sub>, 351.2146; found, 351.2140.

## Diene 33

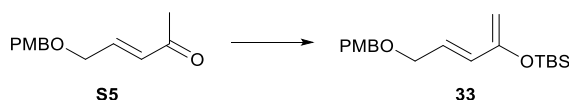

To a stirred solution of enone **S5** (0.200 g, 0.908 mmol) in CH<sub>2</sub>Cl<sub>2</sub> (9 mL) at 0 °C, was added Et<sub>3</sub>N (0.2 mL, 1.5 mmol) and TBSOTf (0.3 mL, 1.5 mmol). The resulting mixture was allowed to warm to room temperature and stirred for 2.5 h before water (9 mL) was added, the layers were separated, and the aqueous layer extracted with CH<sub>2</sub>Cl<sub>2</sub> (2 × 9 mL). The combined organic layers were dried over anhydrous Na<sub>2</sub>SO<sub>4</sub> and concentrated *in vacuo*.

Purification by flash chromatography (pet. ether-Et<sub>2</sub>O 19:1, 1% Et<sub>3</sub>N) afforded the silyl enol ether product (**33**, 0.280 g, 92%) as a colourless oil.

**R<sub>f</sub>** = 0.39 (pet. ether-EtOAc, 19:1);

$\nu_{\max}/\text{cm}^{-1}$ : 2959, 2931, 2857, 1679, 1612, 1513, 1248, 1025, 826;

<sup>1</sup>H NMR (400 MHz, CDCl<sub>3</sub>):  $\delta$  7.28–7.26 (m, 2H), 6.89–6.87 (m, 2H), 6.14–6.04 (m, 2H), 4.46 (s, 2H), 4.31 (d,  $J$  = 2.6 Hz, 2H), 4.07 (d,  $J$  = 4.5 Hz, 2H), 3.81 (s, 3H), 0.97 (s, 9H), 0.19 (s, 6H);

<sup>13</sup>C NMR (100 MHz, CDCl<sub>3</sub>):  $\delta$  159.3, 154.7, 130.5, 130.2, 129.5, 127.1, 113.9, 95.9, 71.9, 69.8, 55.4, 26.0, 18.4, –4.5;

**HRMS** (ESI/Q-TOF)  $m/z$ : [M+Na]<sup>+</sup> calcd for C<sub>19</sub>H<sub>30</sub>NaO<sub>3</sub>Si, 357.1856; found, 357.1848.

### Diene 34

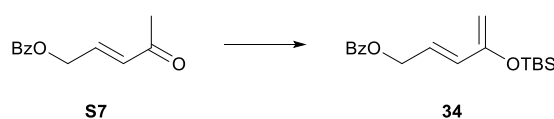

To a stirred solution of enone **S7**<sup>[4]</sup> (0.500 g, 2.45 mmol) in CH<sub>2</sub>Cl<sub>2</sub> (25 mL) at 0 °C, was added Et<sub>3</sub>N (0.55 mL, 3.9 mmol) and TBSOTf (0.9 mL, 3.9 mmol). The resulting mixture was allowed to warm to room temperature and stirred for 1.5 h before water (12 mL) was added, the layers were separated, and the aqueous layer extracted with CH<sub>2</sub>Cl<sub>2</sub> (2 × 12 mL). The combined organic layers were dried over anhydrous Na<sub>2</sub>SO<sub>4</sub> and concentrated *in vacuo*. Purification by flash chromatography (pet. ether-Et<sub>2</sub>O 19:1, 1% Et<sub>3</sub>N) afforded the silyl enol ether product (**34**, 0.796 g, 98%) as a colourless oil.

**R<sub>f</sub>** = 0.53 (pet. ether-EtOAc, 19:1);

$\nu_{\max}/\text{cm}^{-1}$ : 2956, 2931, 2886, 2858, 1721, 1314, 1266, 1109, 1025, 826, 710;

<sup>1</sup>H NMR (400 MHz, CDCl<sub>3</sub>):  $\delta$  8.08–8.05 (m, 2H), 7.58–7.54 (m, 1H), 7.47–7.43 (m, 2H), 6.24–6.12 (m, 2H), 4.89 (d,  $J$  = 5.4 Hz, 2H), 4.37 (d,  $J$  = 1.5 Hz, 2H), 0.98 (s, 9H), 0.19 (s, 6H);

<sup>13</sup>C NMR (100 MHz, CDCl<sub>3</sub>):  $\delta$  166.4, 154.3, 133.1, 131.7, 130.4, 129.8, 128.5, 124.1, 96.9, 64.7, 26.0, 18.4, –2.8, –4.5;

**HRMS** (ESI/Q-TOF)  $m/z$ : [M+Na]<sup>+</sup> calcd for C<sub>18</sub>H<sub>26</sub>NaO<sub>3</sub>Si, 341.1543; found, 341.1540.

The analytical data were in agreement with those reported in the literature.<sup>[4]</sup>

### Diene 38

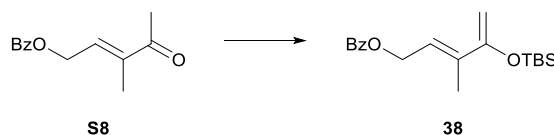

To a stirred solution of enone **S8**<sup>[5]</sup> (0.100 g, 0.458 mmol) in CH<sub>2</sub>Cl<sub>2</sub> (5 mL) at 0 °C, was added Et<sub>3</sub>N (0.10 mL, 0.73 mmol) and TBSOTf (0.17 mL, 0.73 mmol). The resulting mixture was allowed to warm to room temperature and stirred for 2 h before water (2.5 mL) was added, the layers were separated, and the aqueous layer extracted with CH<sub>2</sub>Cl<sub>2</sub> (2 × 5 mL). The combined organic layers were dried over anhydrous Na<sub>2</sub>SO<sub>4</sub> and concentrated *in vacuo*. Purification by flash chromatography (pet. ether-Et<sub>2</sub>O 19:1, 1% Et<sub>3</sub>N) afforded the silyl enol ether product (**38**, 0.148 g, 97 %) as a colourless oil.

**R<sub>f</sub>** = 0.79 (pet. ether-EtOAc, 19:1);

<sup>1</sup>H NMR (400 MHz, CDCl<sub>3</sub>): δ 8.06–8.03 (m, 2H), 7.55 (tt, *J* = 7.6, 2.0 Hz, 1H), 7.46–7.42 (m, 2H), 6.26–6.23 (m, 1H), 4.97 (d, *J* = 7.0 Hz, 2H), 4.56 (d, *J* = 1.4 Hz, 1H), 4.38 (s, 1H), 1.89 (s, 3H), 0.97 (s, 9H), 0.18 (s, 6H).  
<sup>13</sup>C NMR (100 MHz, CDCl<sub>3</sub>): δ 166.5, 156.5, 135.8, 132.9, 130.4, 129.6, 128.3, 121.4, 93.2, 62.0, 25.9, 18.3, 13.6, –4.7.

The analytical data were in agreement with those reported in the literature.<sup>[5]</sup>

## Reactions of lactams **27** and **28** with boron-substituted furans **S9–S11**

All of the following reaction conditions returned only unreacted starting materials, except for Table S1, entry 5, wherein partial alcoholysis of **S9** was observed.

**Table S1.** Diels-Alder cycloaddition of *N*-Cbz lactam **27** with 2-boron-substituted furans **S9–S11**.

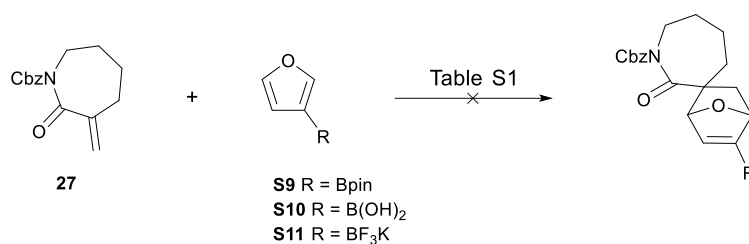

| Entry | R                  | Conditions                                                     |
|-------|--------------------|----------------------------------------------------------------|
| 1     |                    | toluene/acetonitrile (2:1), 80 °C, 18 h                        |
| 2     |                    | Mg(OTf) <sub>2</sub> , toluene/acetonitrile (2:1), 80 °C, 18 h |
| 3     | Bpin               | p-xylene, 165 °C, 18 h                                         |
| 4     |                    | Mg(OTf) <sub>2</sub> , p-xylene, 165 °C, 18 h                  |
| 5     |                    | ethanol, 100 °C, 54 h                                          |
| 6     |                    | toluene/acetonitrile (2:1), 50 °C, 72 h                        |
| 7     | B(OH) <sub>2</sub> | toluene/acetonitrile (2:1), 80 °C, 18 h                        |
| 8     | BF <sub>3</sub> K  | acetonitrile, rt, 18 h                                         |
| 9     |                    | acetonitrile, 80 °C, 18 h                                      |

**Table S2.** Diels-Alder cycloaddition of *N*-Ts lactam **28** with 2-boron-substituted furans **S10** and **S11**.

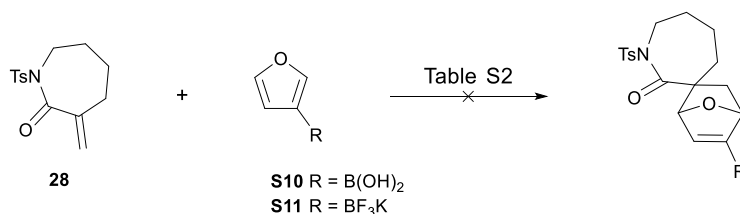

| Entry | R                  | Conditions                              |
|-------|--------------------|-----------------------------------------|
| 1     | B(OH) <sub>2</sub> | Toluene/acetonitrile (2:1), 80 °C, 18 h |
| 2     | BF <sub>3</sub> K  | acetonitrile, rt, 18 h                  |
| 3     |                    | acetonitrile, 80 °C, 18 h               |

## Amide 15a

$^1\text{H}$  NMR (400 MHz,  $\text{CDCl}_3$ )

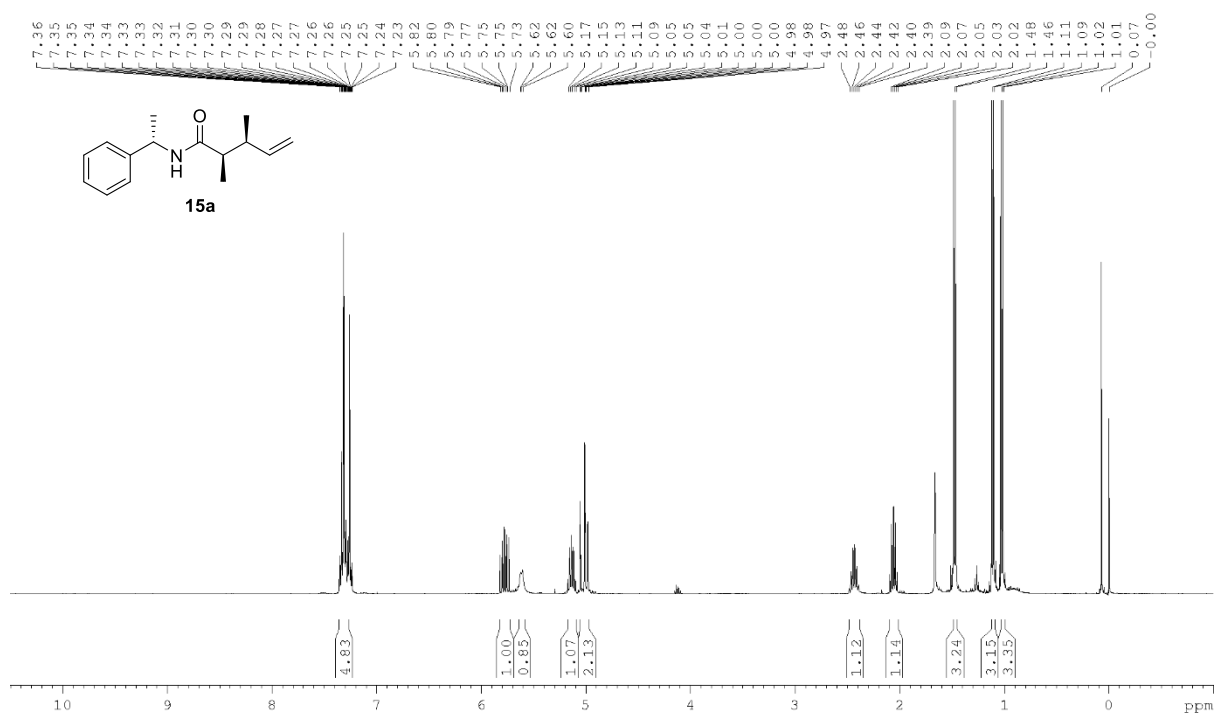

$^{13}\text{C}$  NMR (100 MHz,  $\text{CDCl}_3$ )

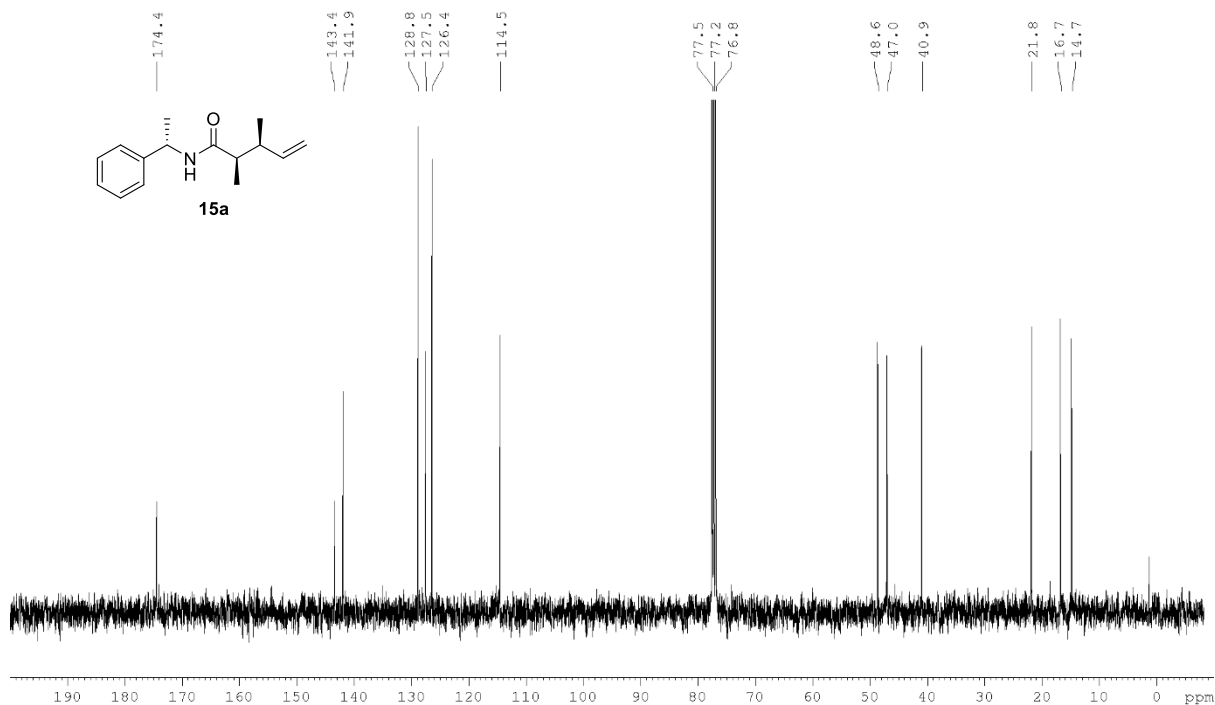

# Amine S12

$^1\text{H}$  NMR (400 MHz,  $\text{CDCl}_3$ )

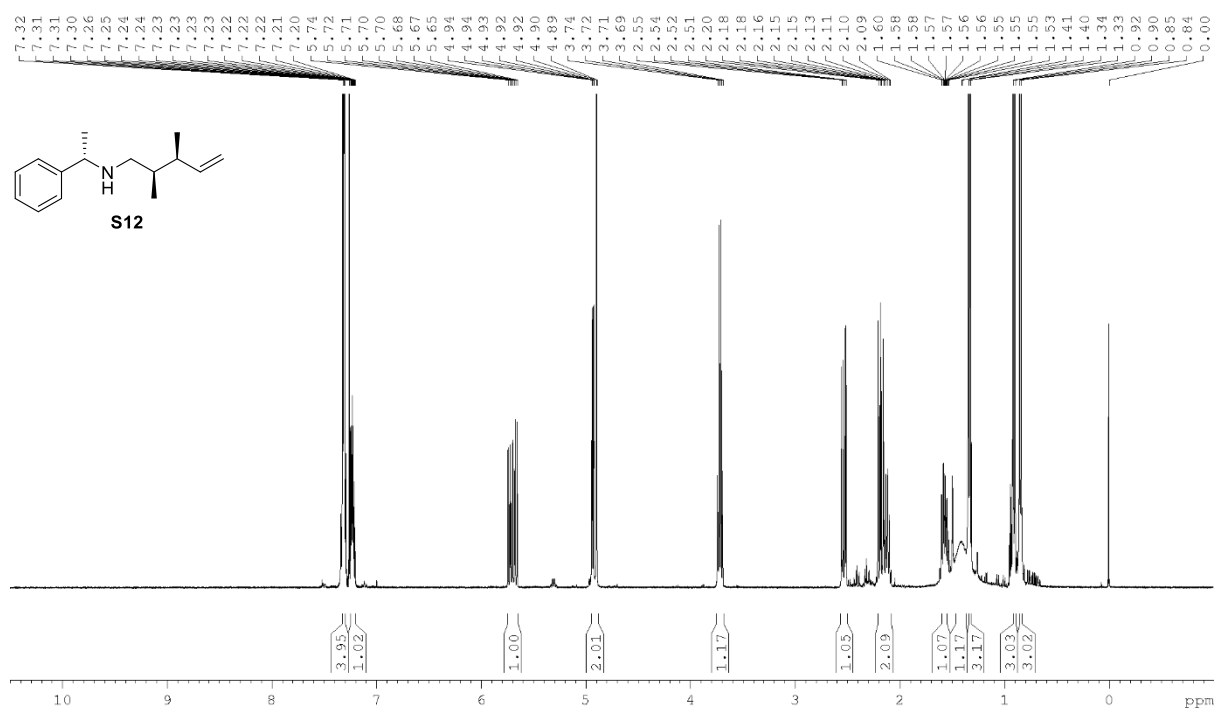

$^{13}\text{C}$  NMR (100 MHz,  $\text{CDCl}_3$ )

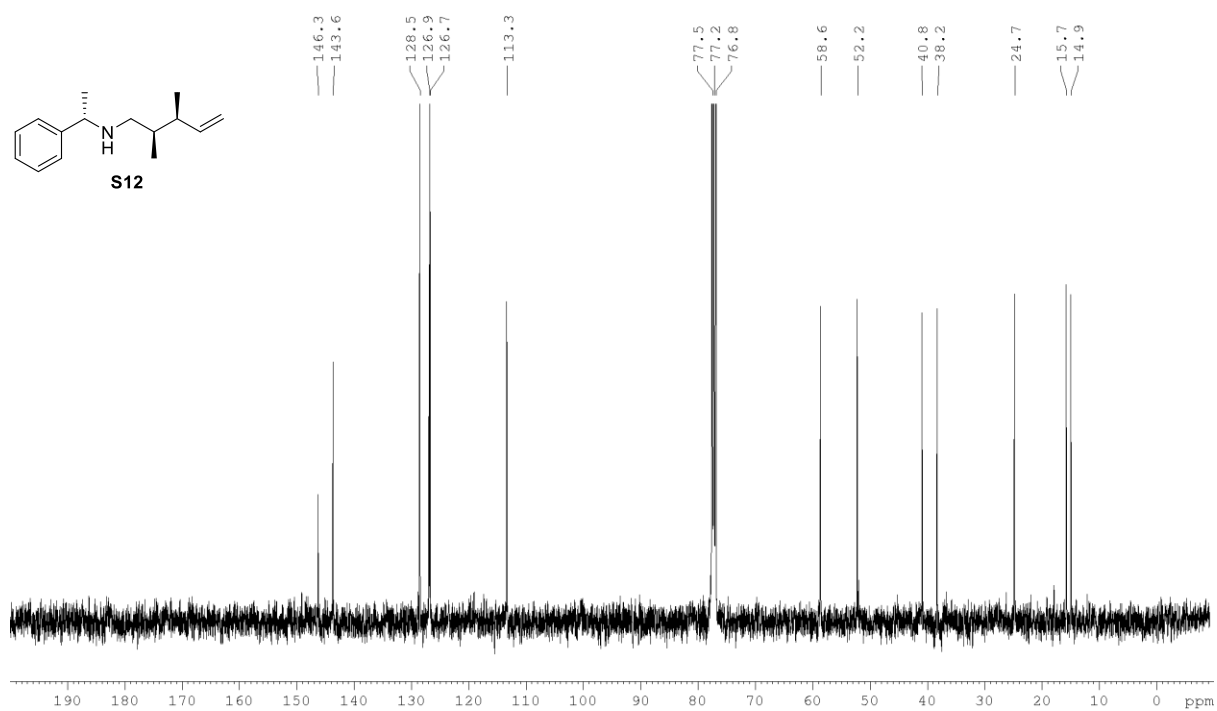



## N-Boc-amine 21

$^1\text{H}$  NMR (400 MHz, DMSO- $d_6$ , 340 K)

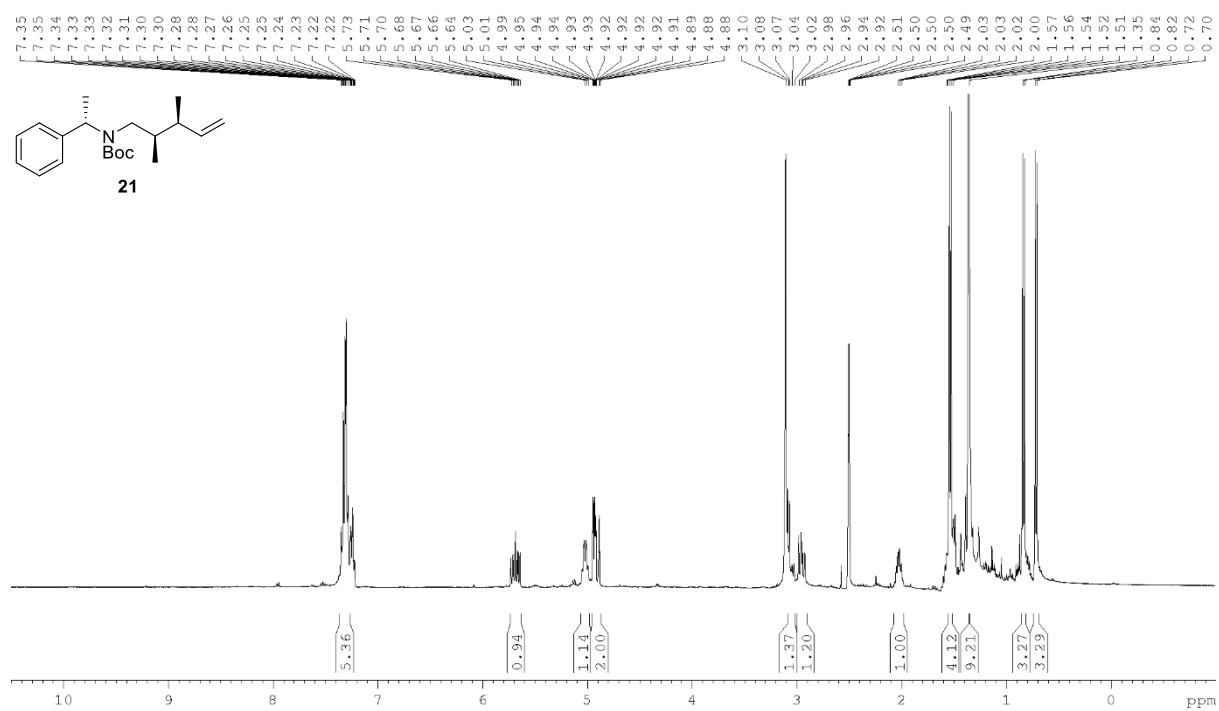

$^{13}\text{C}$  NMR (100 MHz, DMSO- $d_6$ , 340 K)

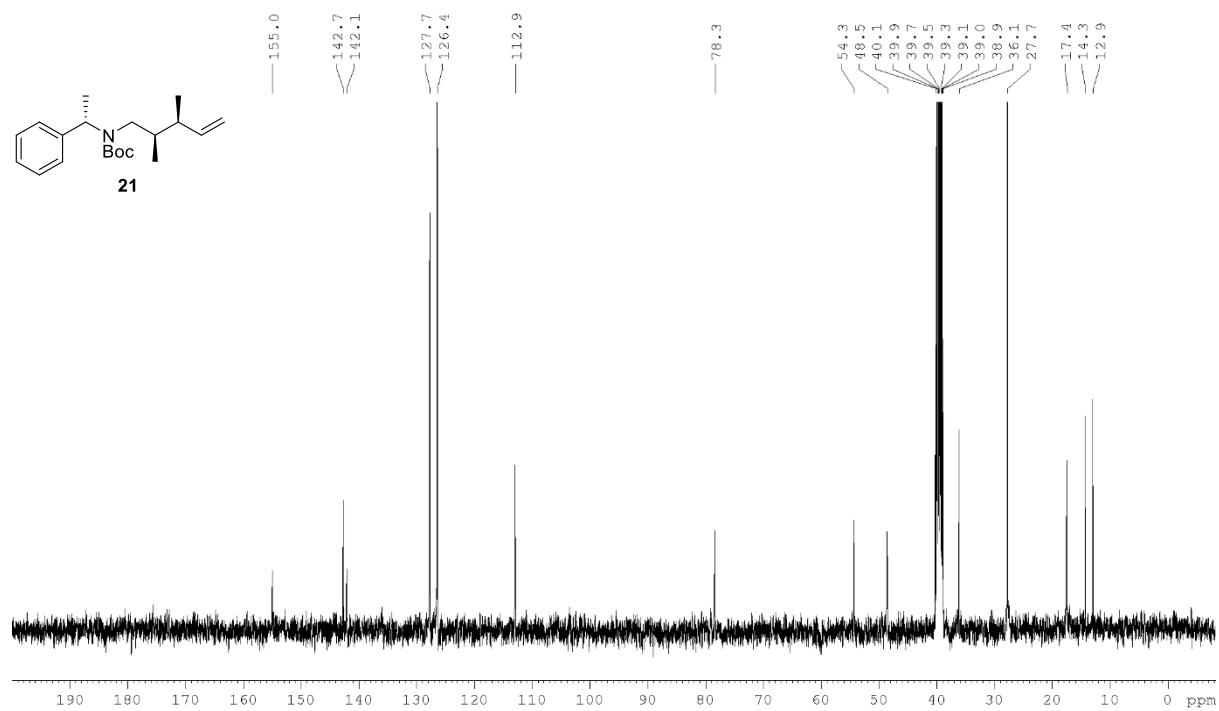

## $\alpha,\beta$ -Unsaturated ester **22**

$^1\text{H}$  NMR (400 MHz, DMSO- $d_6$ , 340 K)

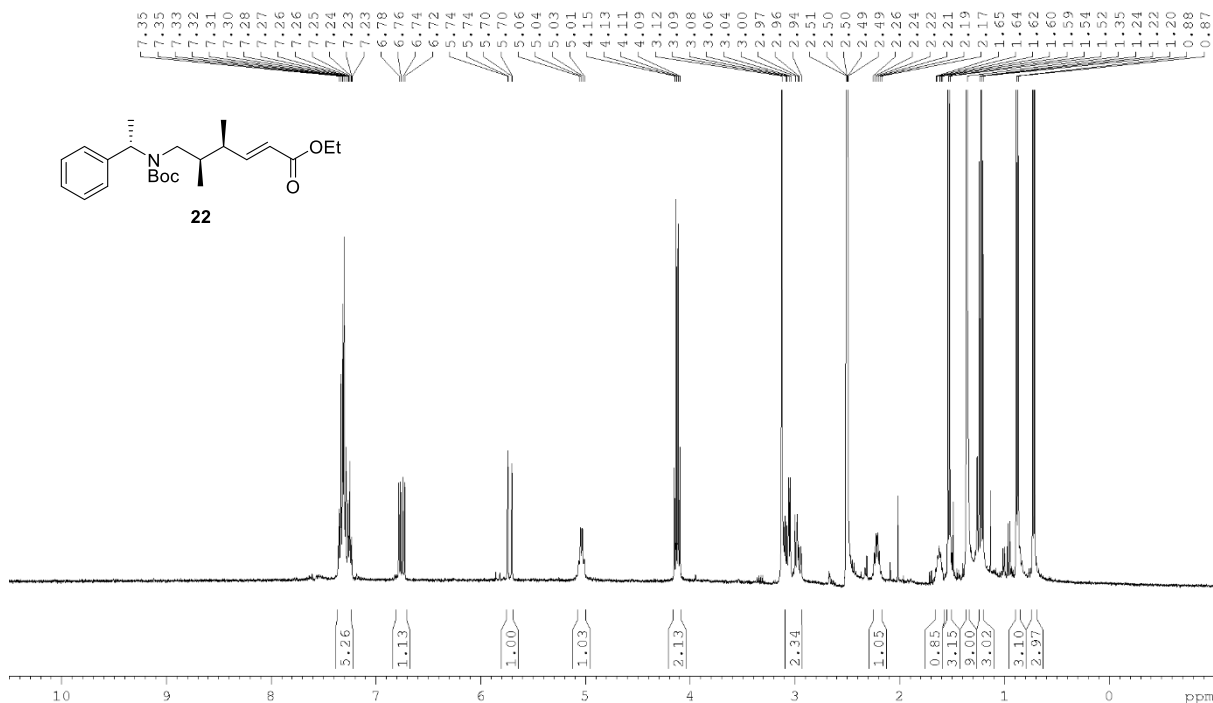

$^{13}\text{C}$  NMR (100 MHz,  $\text{CDCl}_3$ , 300K)

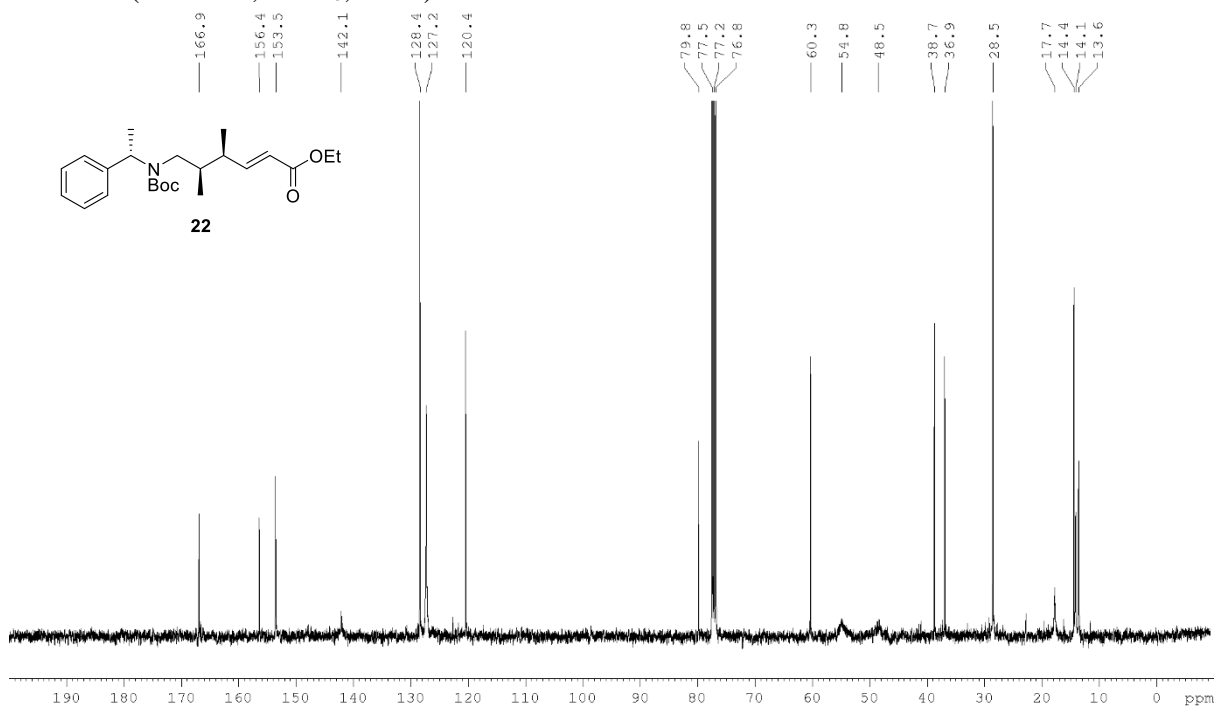

Significant signal broadening was observed in the  $^{13}\text{C}$  NMR spectrum due to the presence of rotamers. Attempts to obtain a clear  $^{13}\text{C}$  NMR at 340K were not successful, as degradation of  $\alpha,\beta$ -unsaturated ester **22** occurred during the experiment before resolution of rotamers.

## N-Boc-aminoester 23

$^1\text{H}$  NMR (400 MHz,  $\text{CDCl}_3$ )

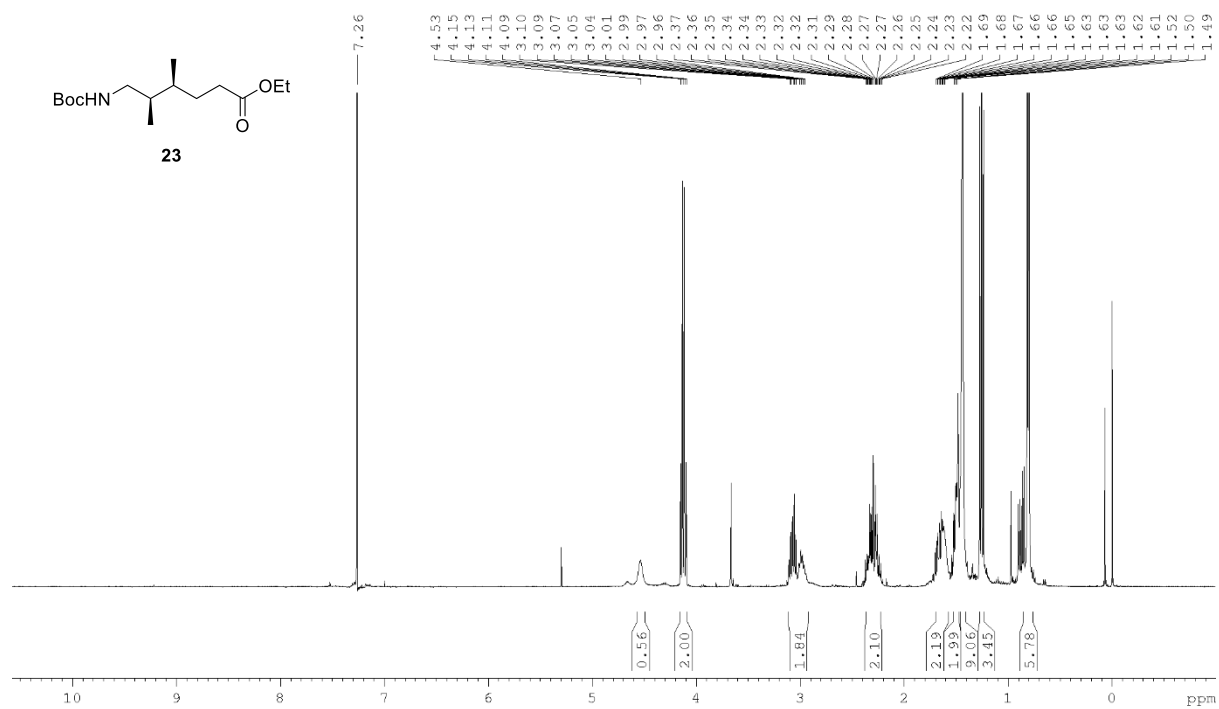

$^{13}\text{C}$  NMR (100 MHz,  $\text{CDCl}_3$ )

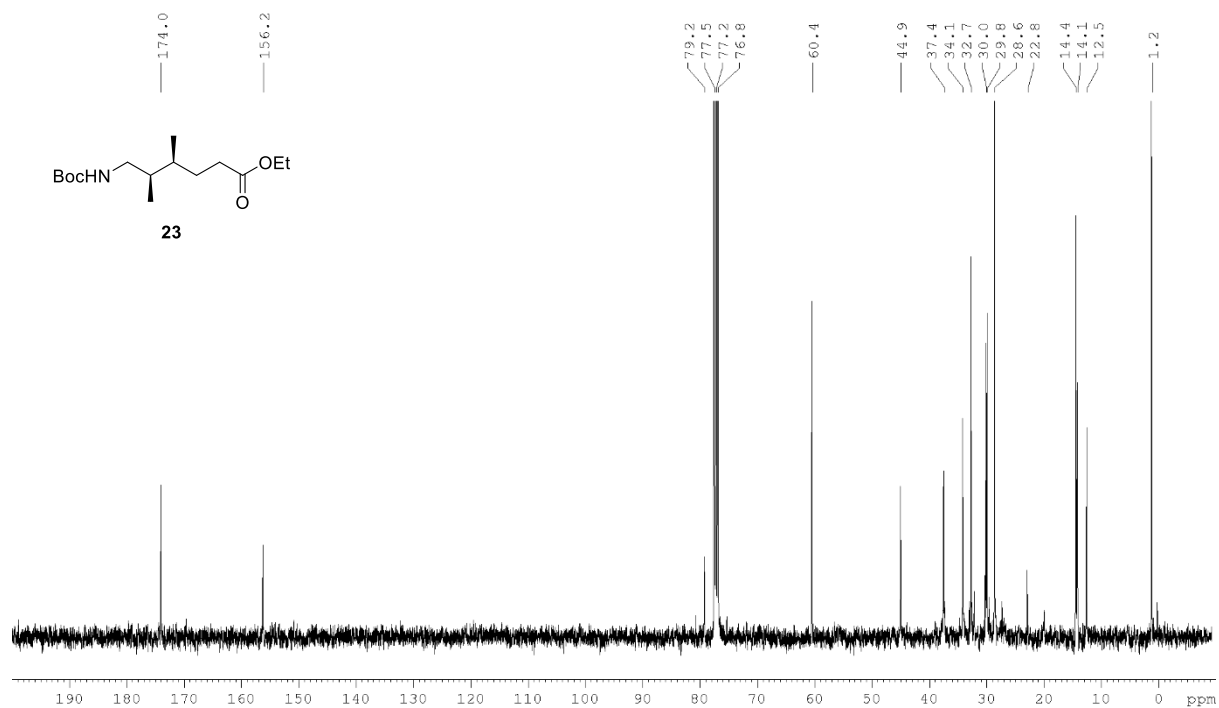

# Lactam 24

$^1\text{H}$  NMR (400 MHz,  $\text{CDCl}_3$ )

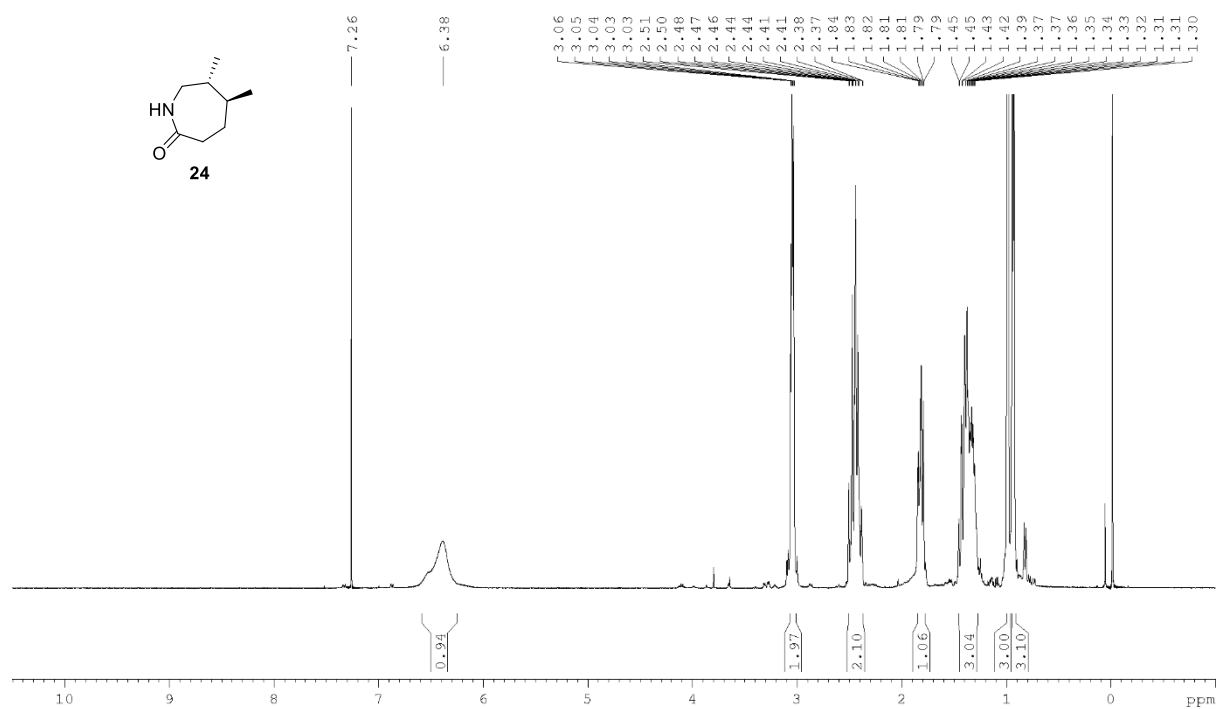

$^{13}\text{C}$  NMR (100 MHz,  $\text{CDCl}_3$ )

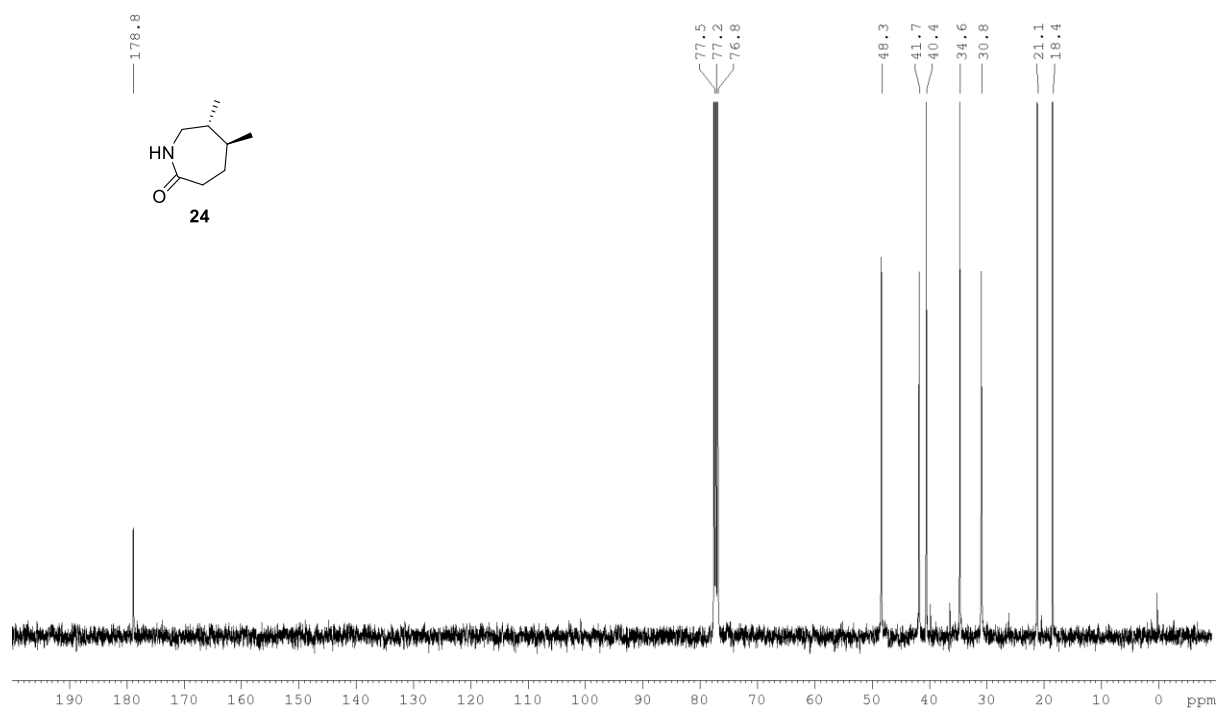

# N-Cbz-lactam S13

<sup>1</sup>H NMR (400 MHz, CDCl<sub>3</sub>)

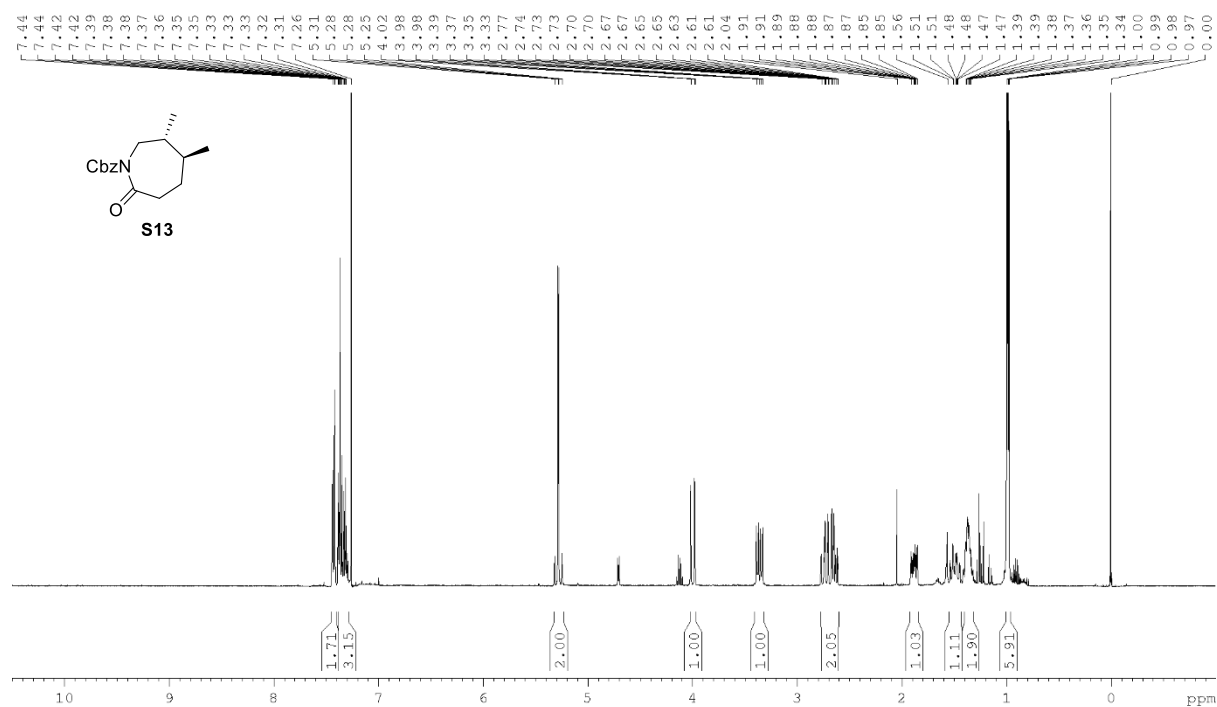

<sup>13</sup>C NMR (100 MHz, CDCl<sub>3</sub>)

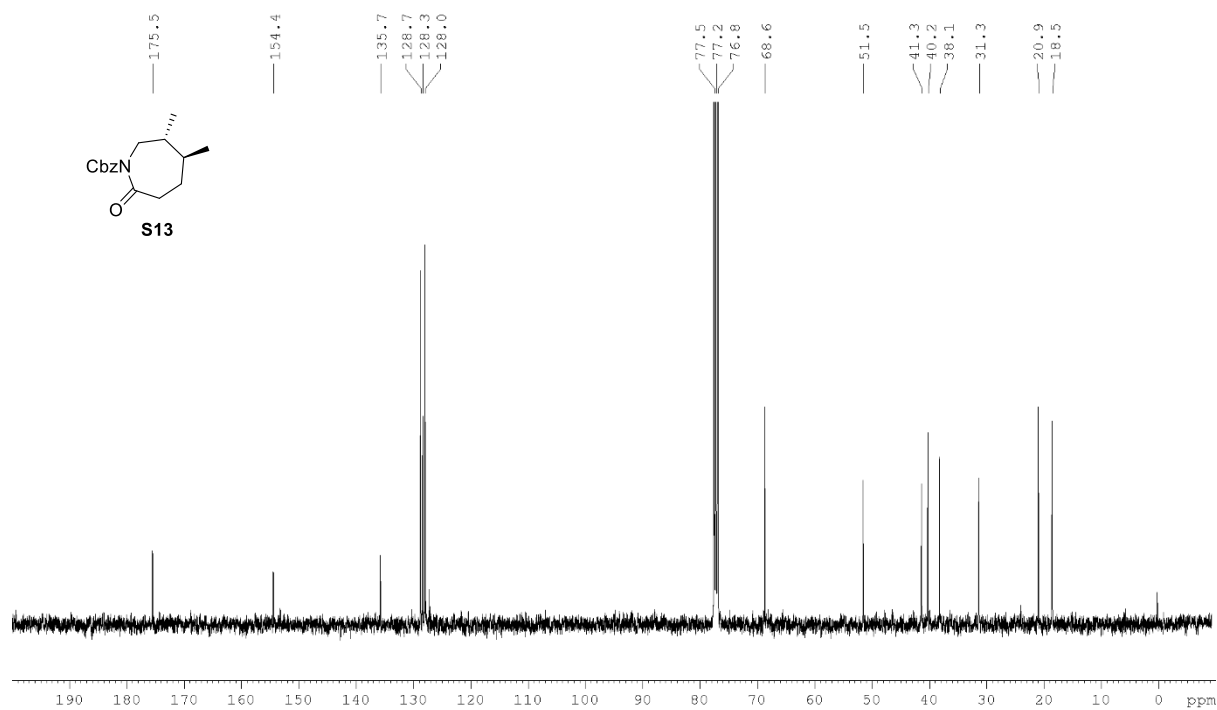

### *$\alpha$* -Exo-methylene lactam **8**

$^1\text{H}$  NMR (400 MHz,  $\text{CDCl}_3$ )

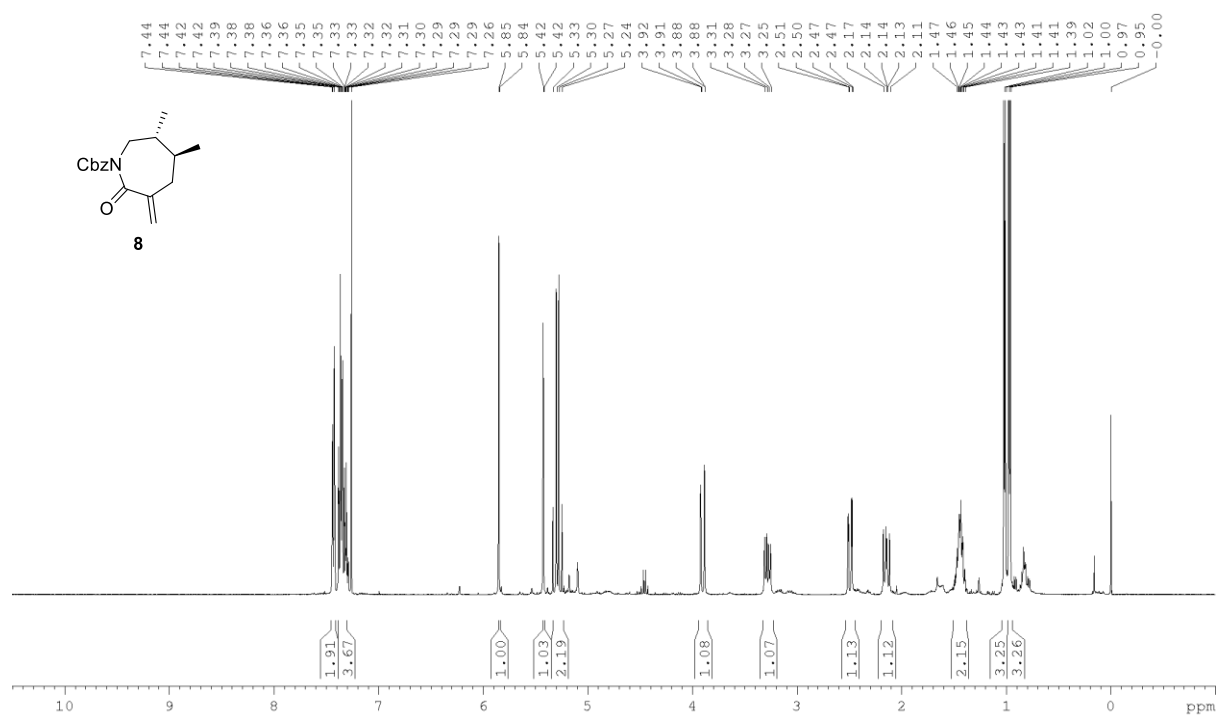

$^{13}\text{C}$  NMR (100 MHz,  $\text{CDCl}_3$ )

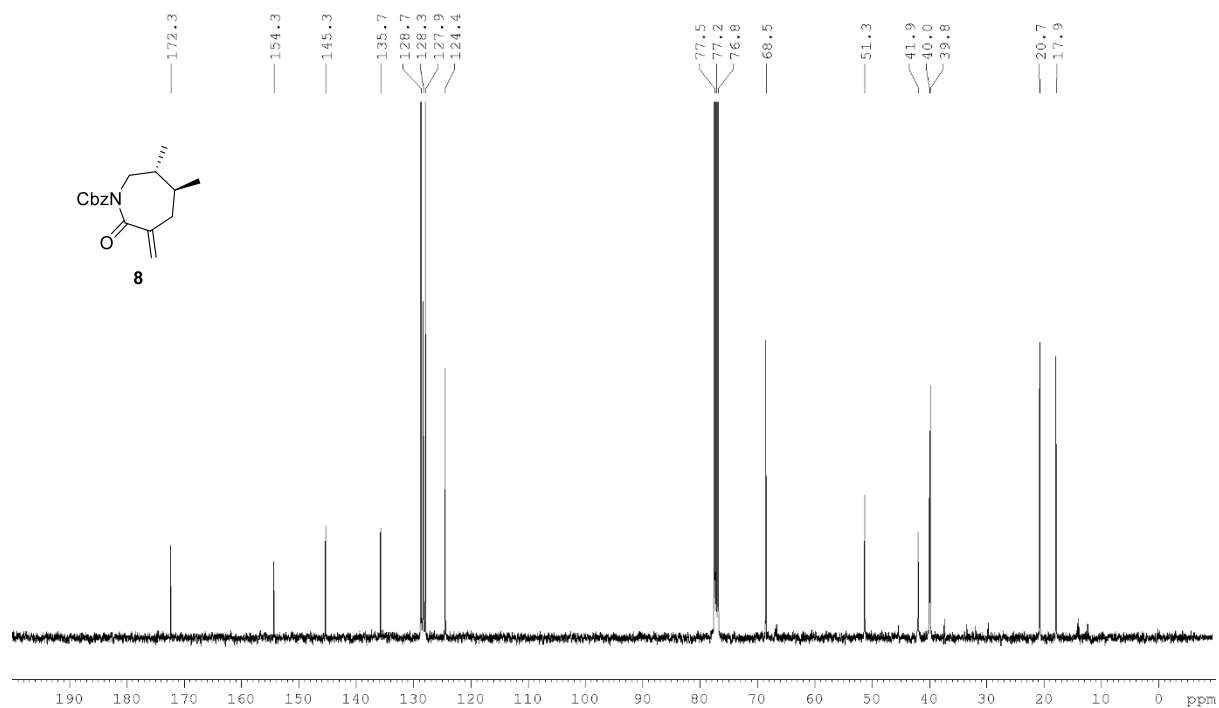

# Alcohol S1

$^1\text{H}$  NMR (500 MHz,  $\text{CDCl}_3$ )

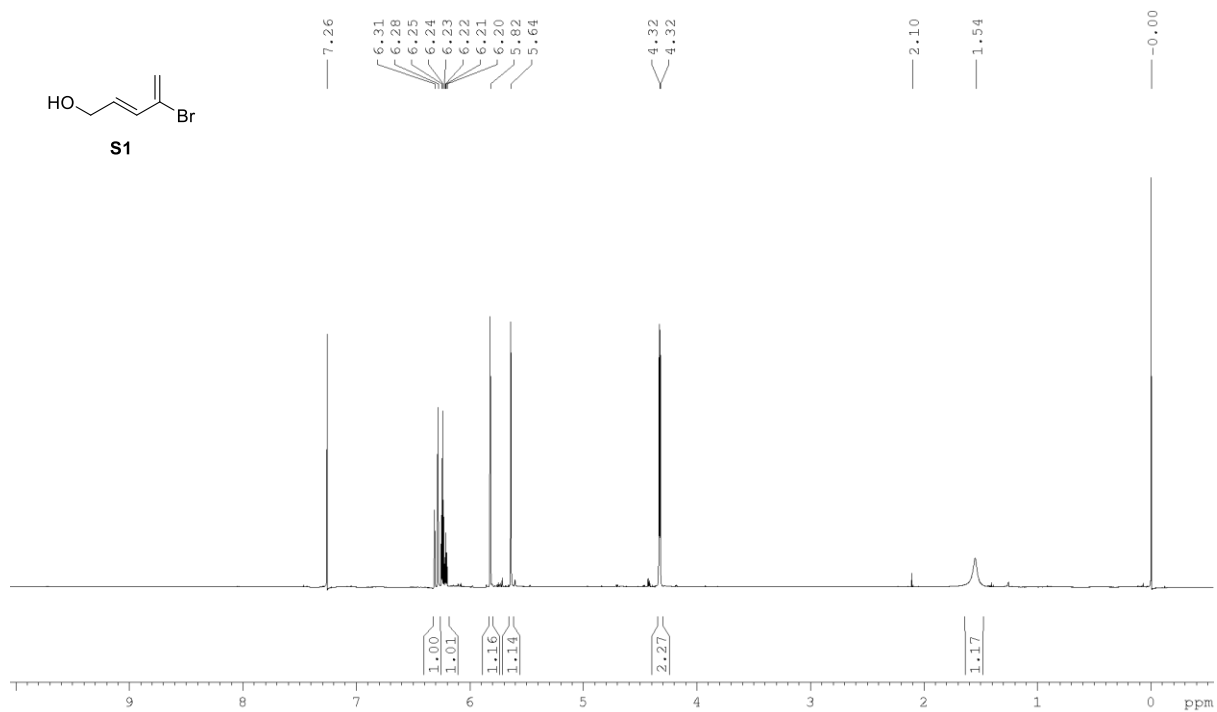

$^{13}\text{C}$  NMR (125 MHz,  $\text{CDCl}_3$ )

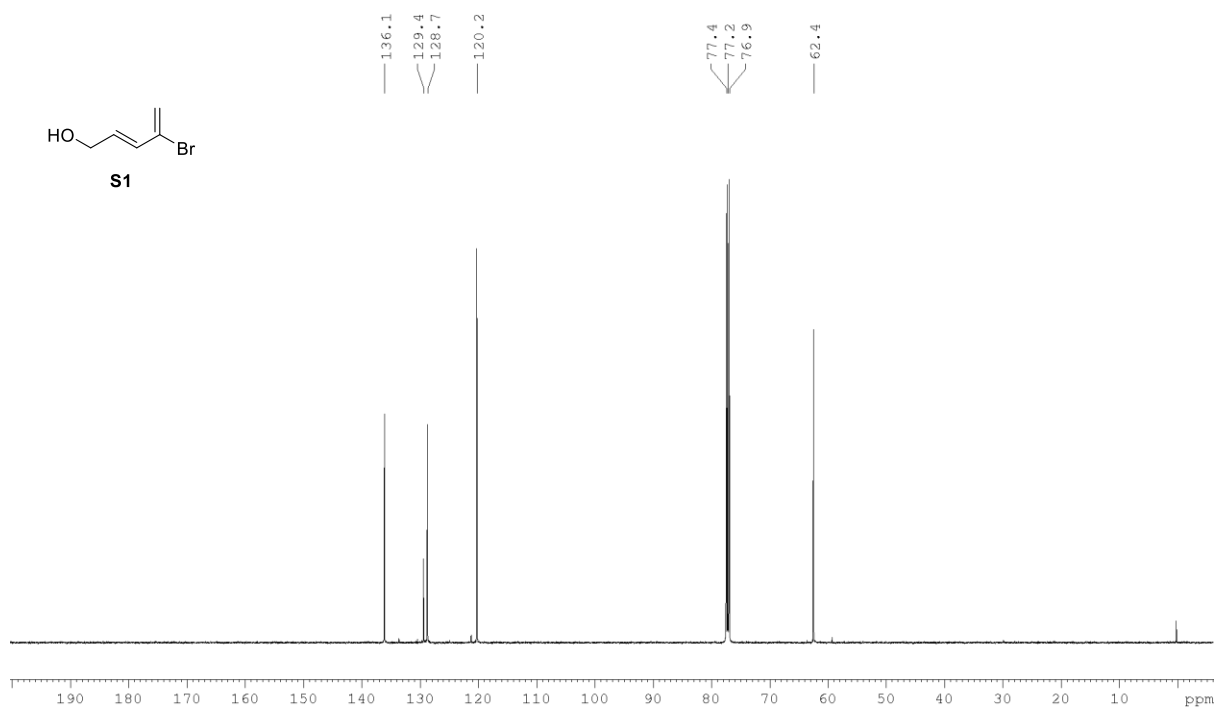

## Bromodiene 26

$^1\text{H}$  NMR (500 MHz,  $\text{CDCl}_3$ )

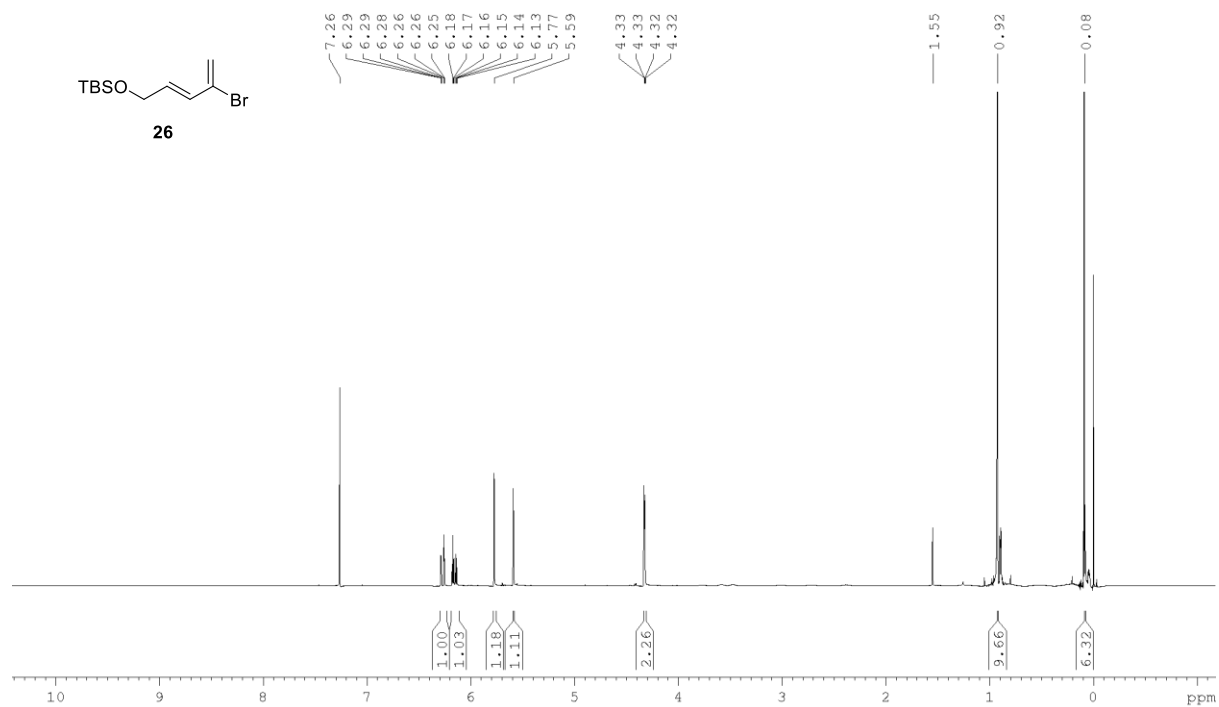

$^{13}\text{C}$  NMR (125 MHz,  $\text{CDCl}_3$ )

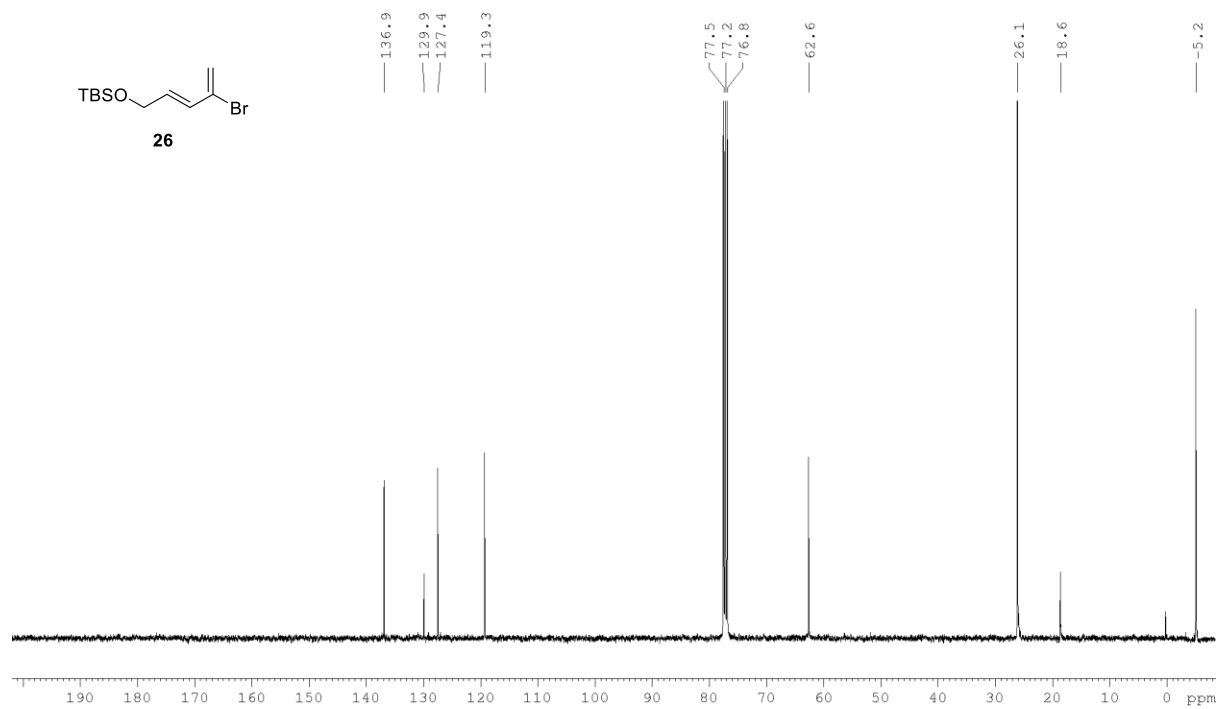



***α*-Exo-methylene lactam 28**

<sup>1</sup>H NMR (500 MHz, CDCl<sub>3</sub>)

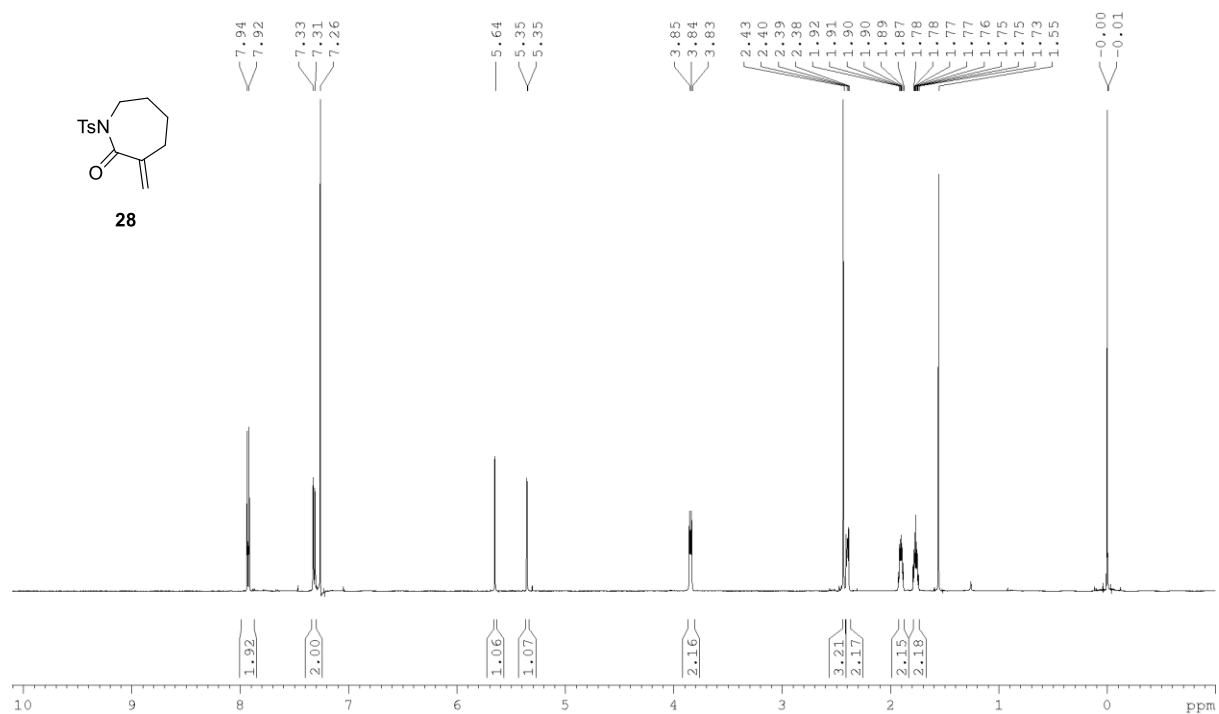

<sup>13</sup>C NMR (125 MHz, CDCl<sub>3</sub>)

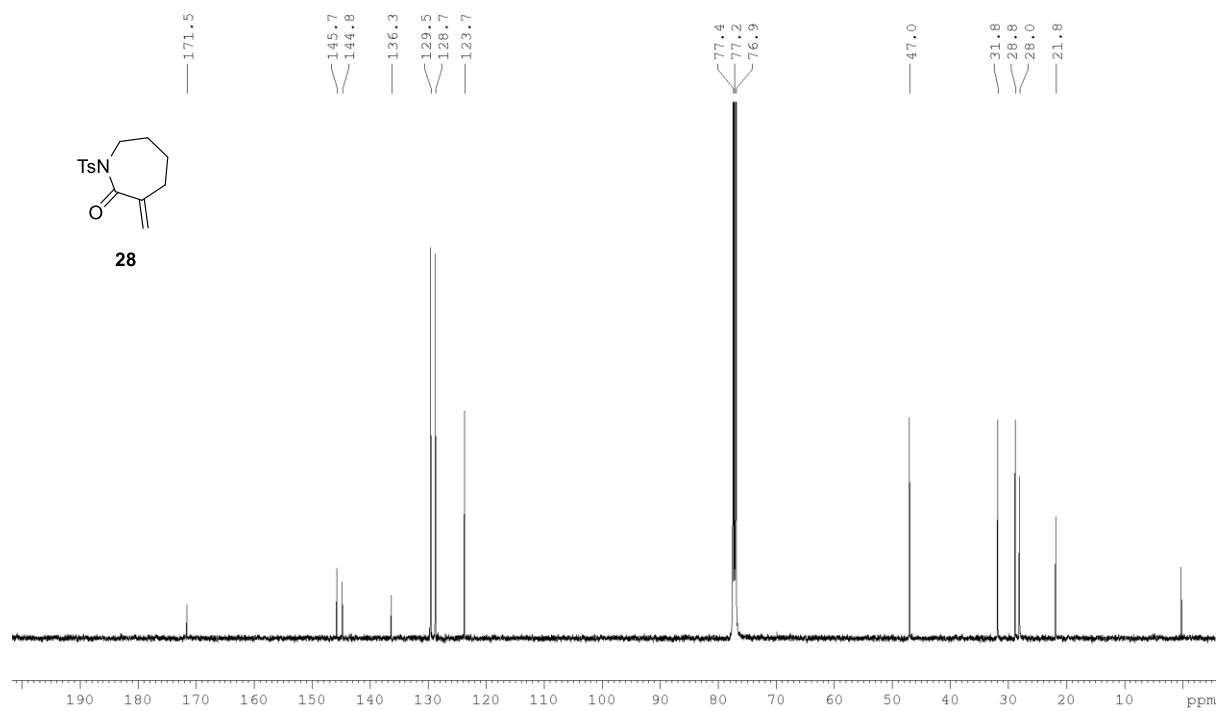

### Enone S3

$^1\text{H}$  NMR (400 MHz,  $\text{CDCl}_3$ )

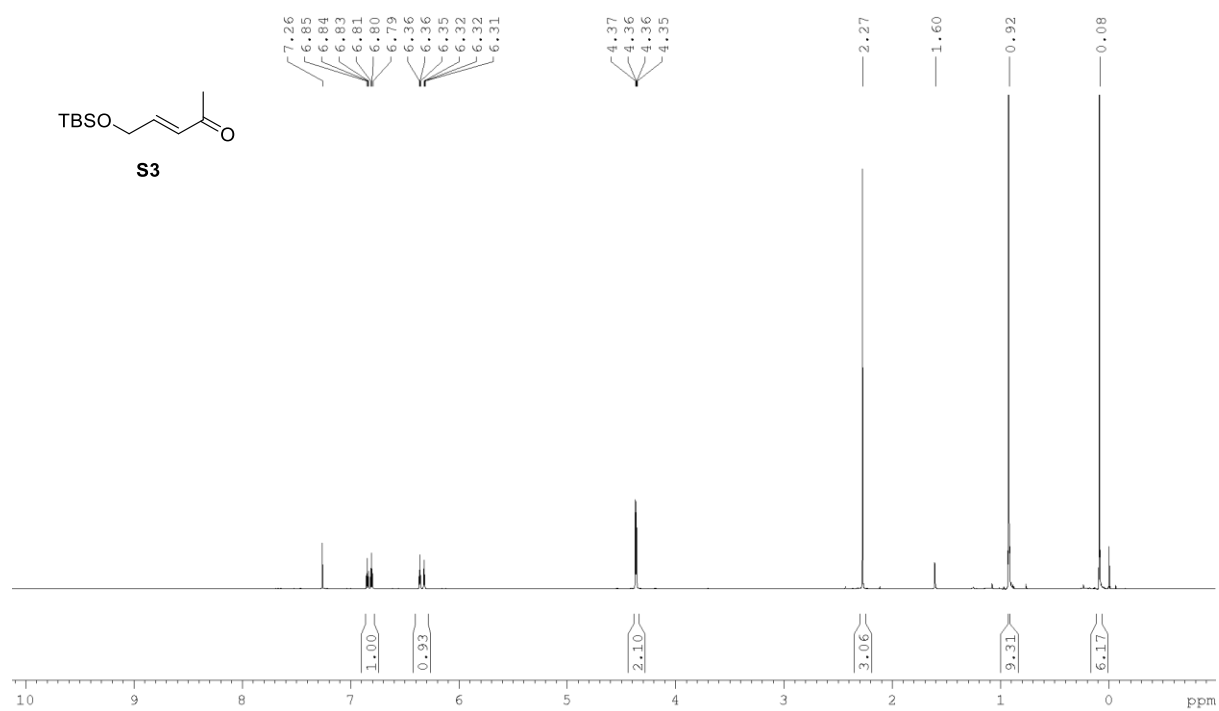

$^{13}\text{C}$  NMR (100 MHz,  $\text{CDCl}_3$ )

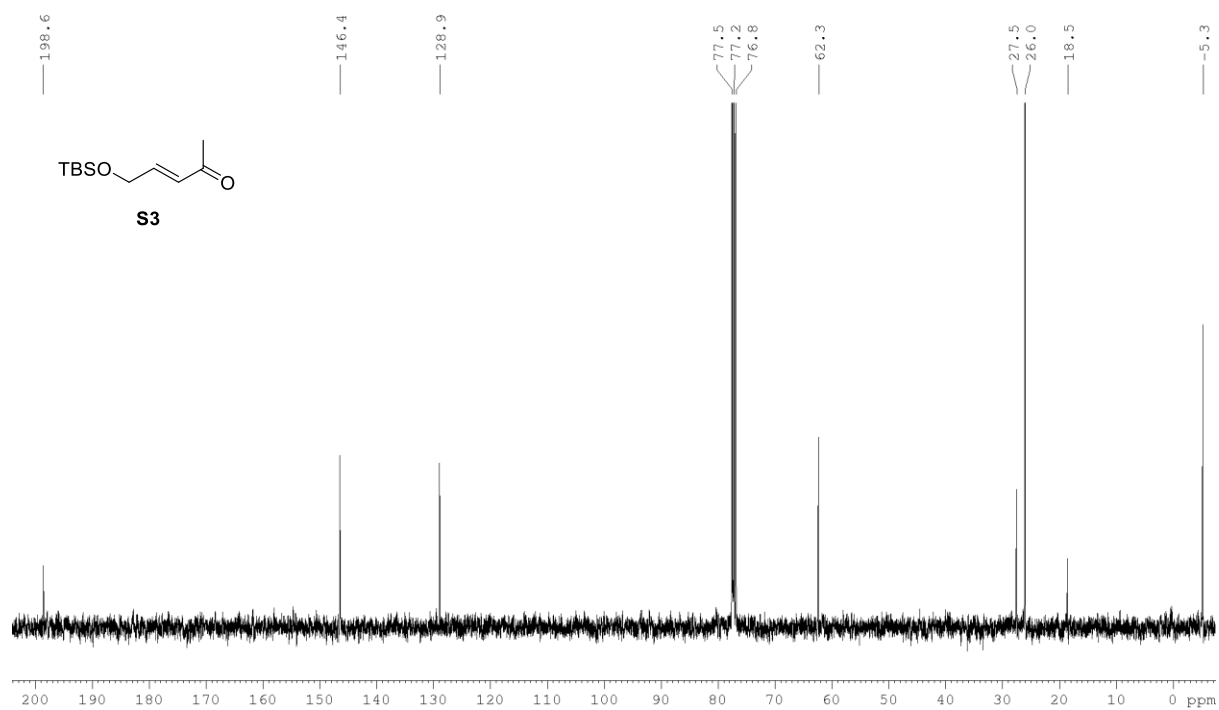

# Enone S5

$^1\text{H}$  NMR (400 MHz,  $\text{CDCl}_3$ )

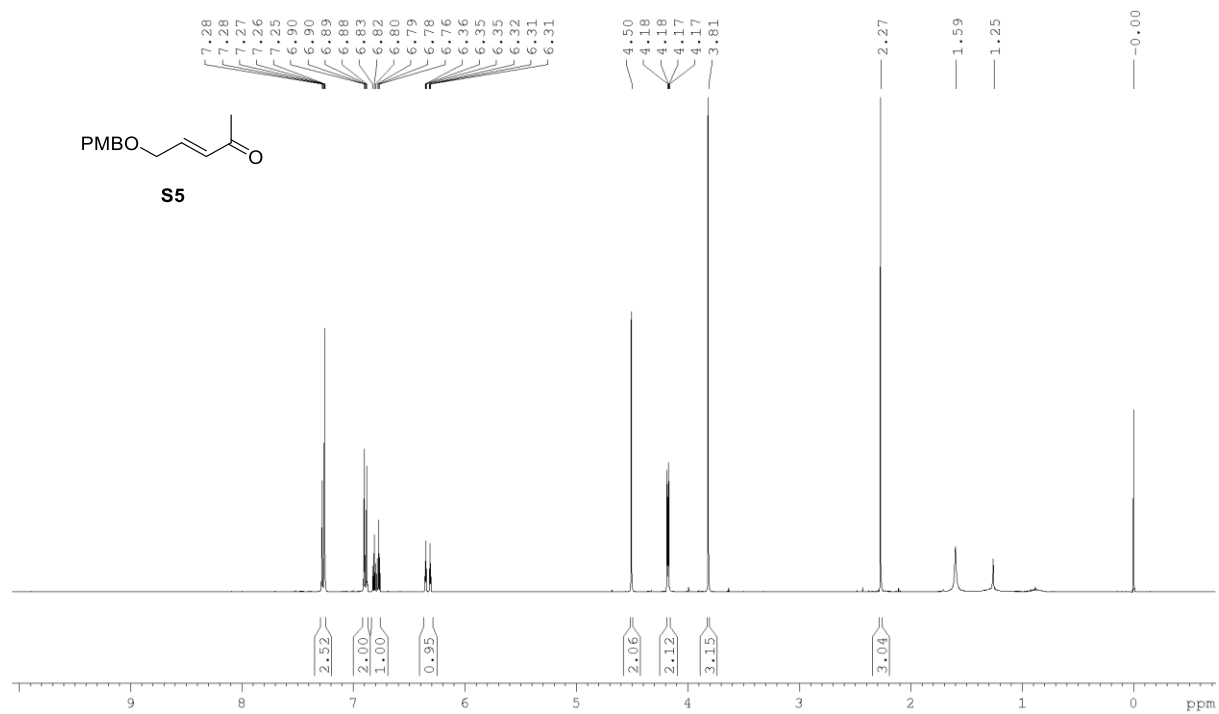

$^{13}\text{C}$  NMR (100 MHz,  $\text{CDCl}_3$ )

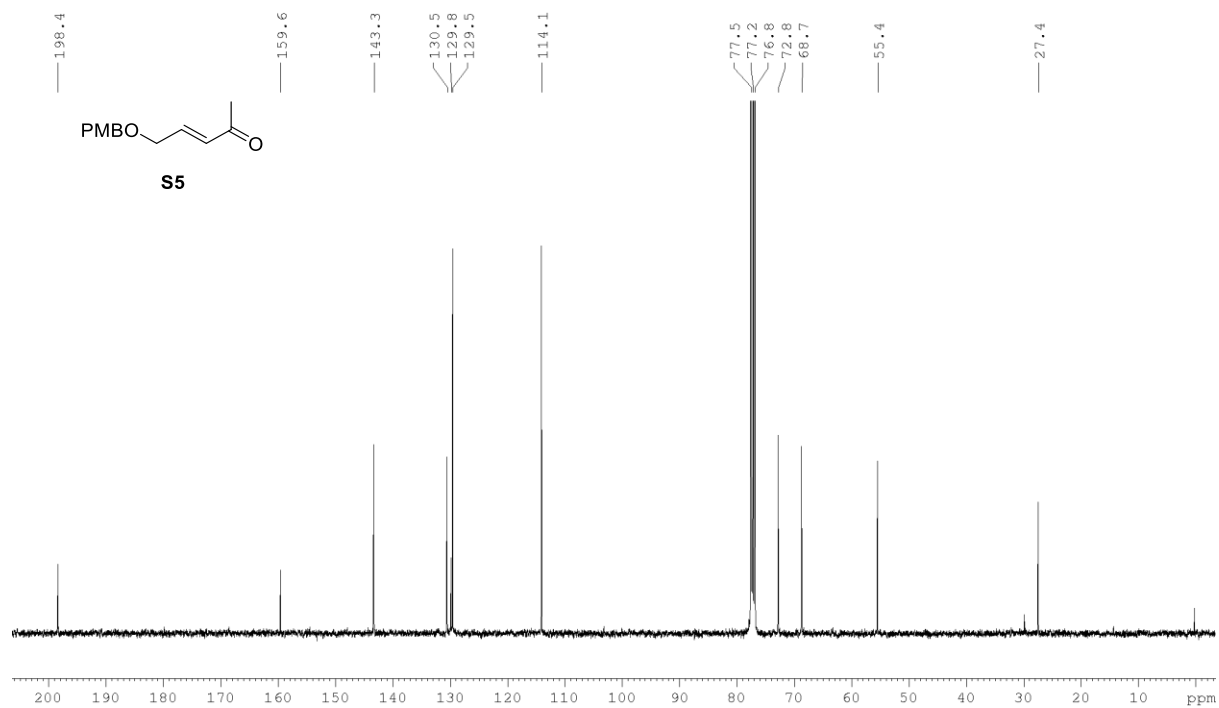

## Diene 32

$^1\text{H}$  NMR (400 MHz,  $\text{CDCl}_3$ )

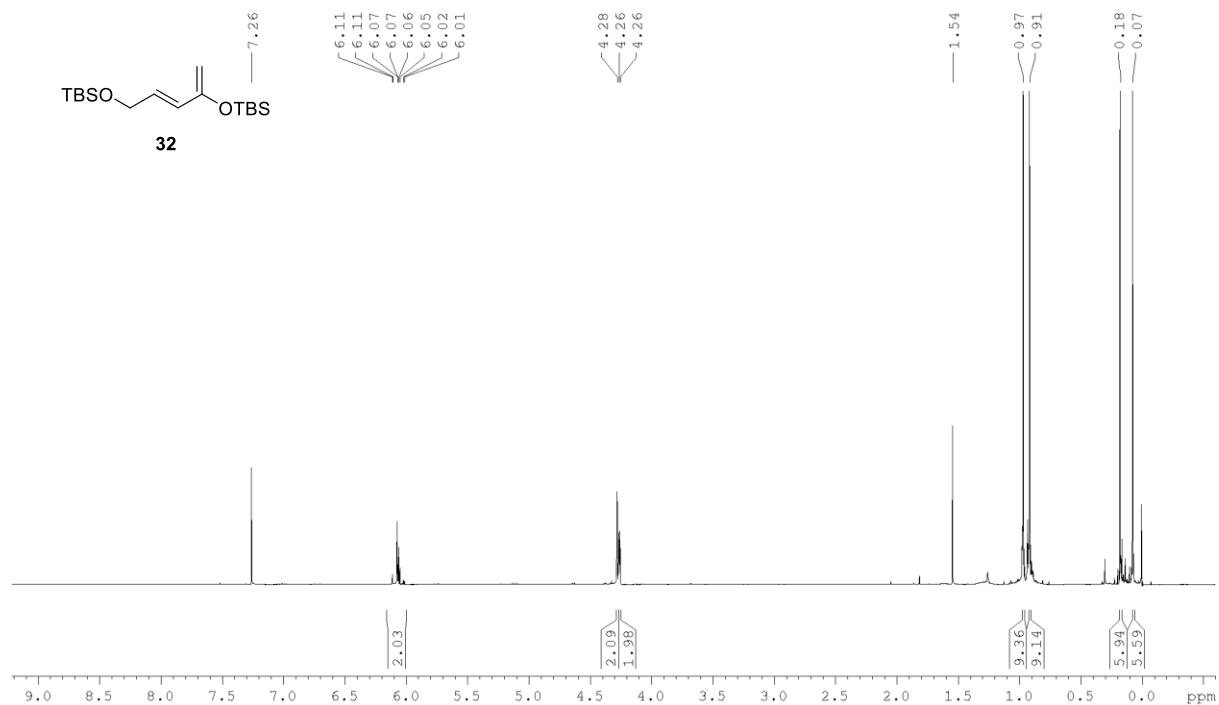

$^{13}\text{C}$  NMR (100 MHz,  $\text{CDCl}_3$ )

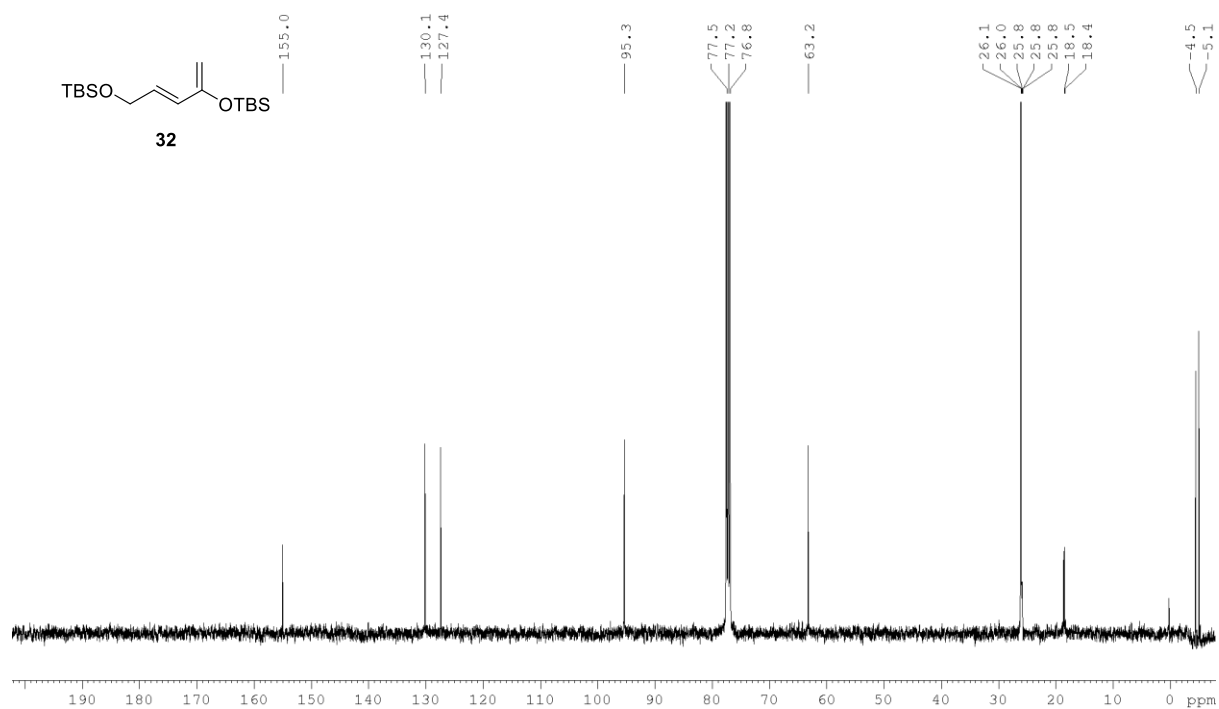

## Diene 33

$^1\text{H}$  NMR (400 MHz,  $\text{CDCl}_3$ )

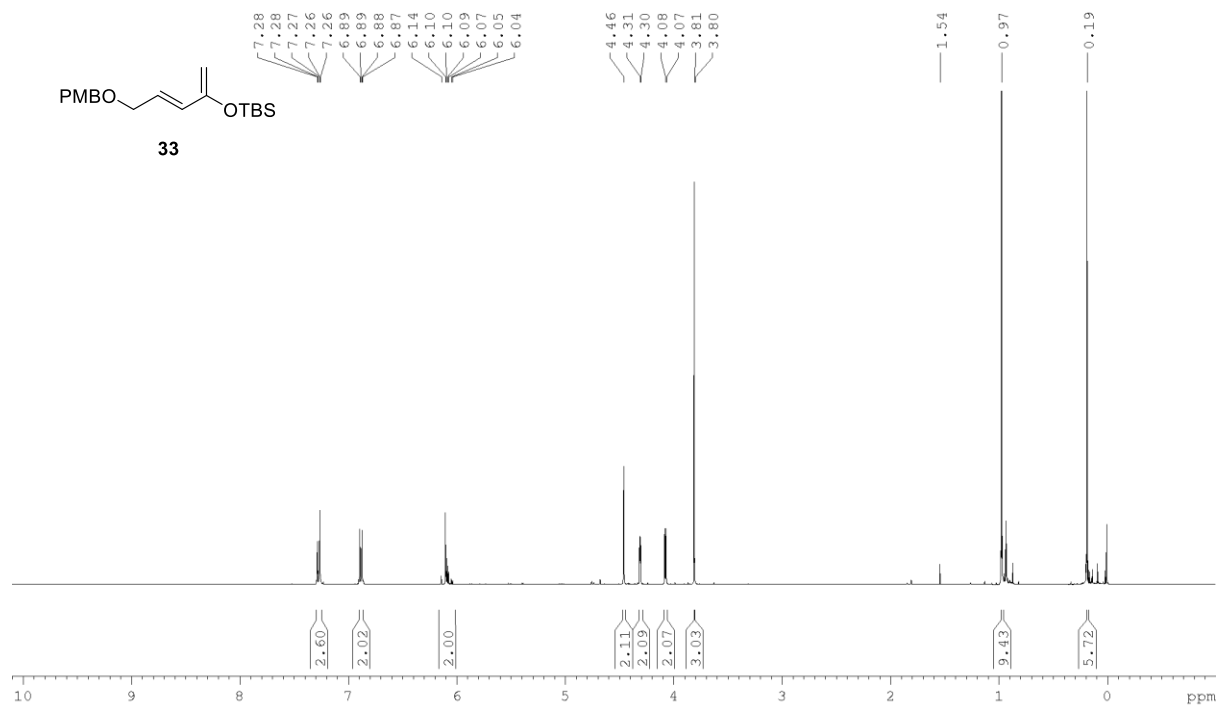

$^{13}\text{C}$  NMR (100 MHz,  $\text{CDCl}_3$ )

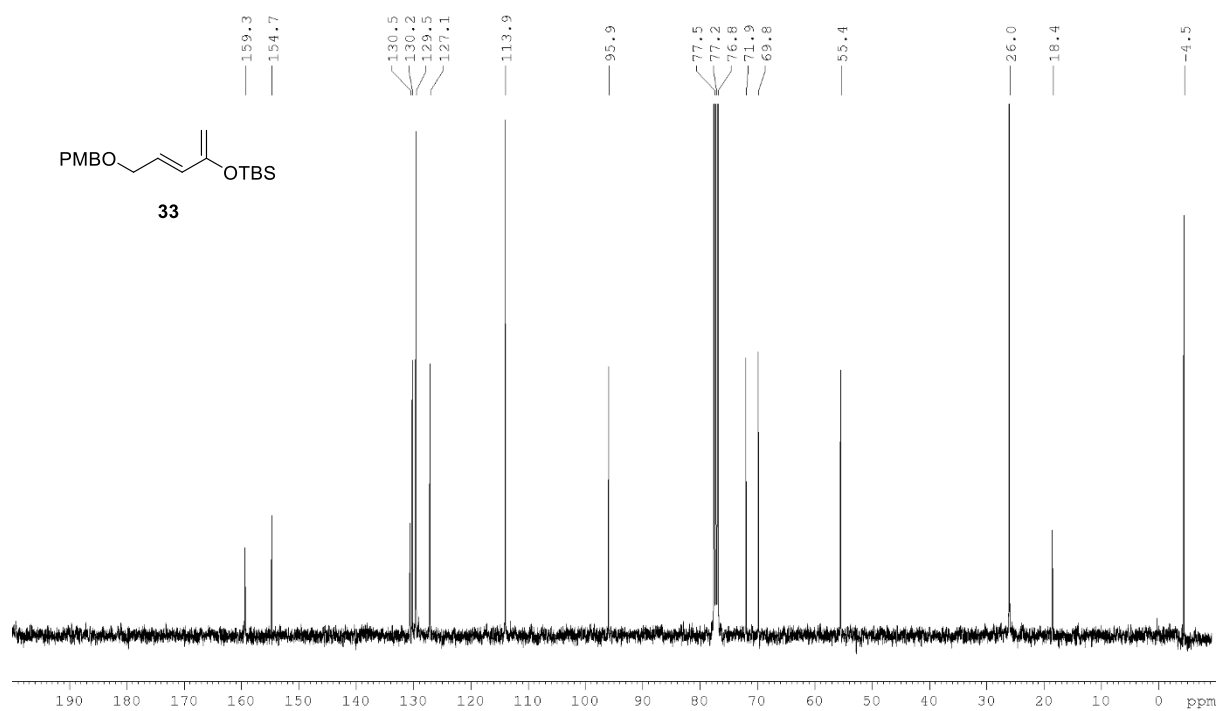





# Cycloadduct ( $\pm$ )-35

$^1\text{H}$  NMR (400 MHz,  $\text{CDCl}_3$ )

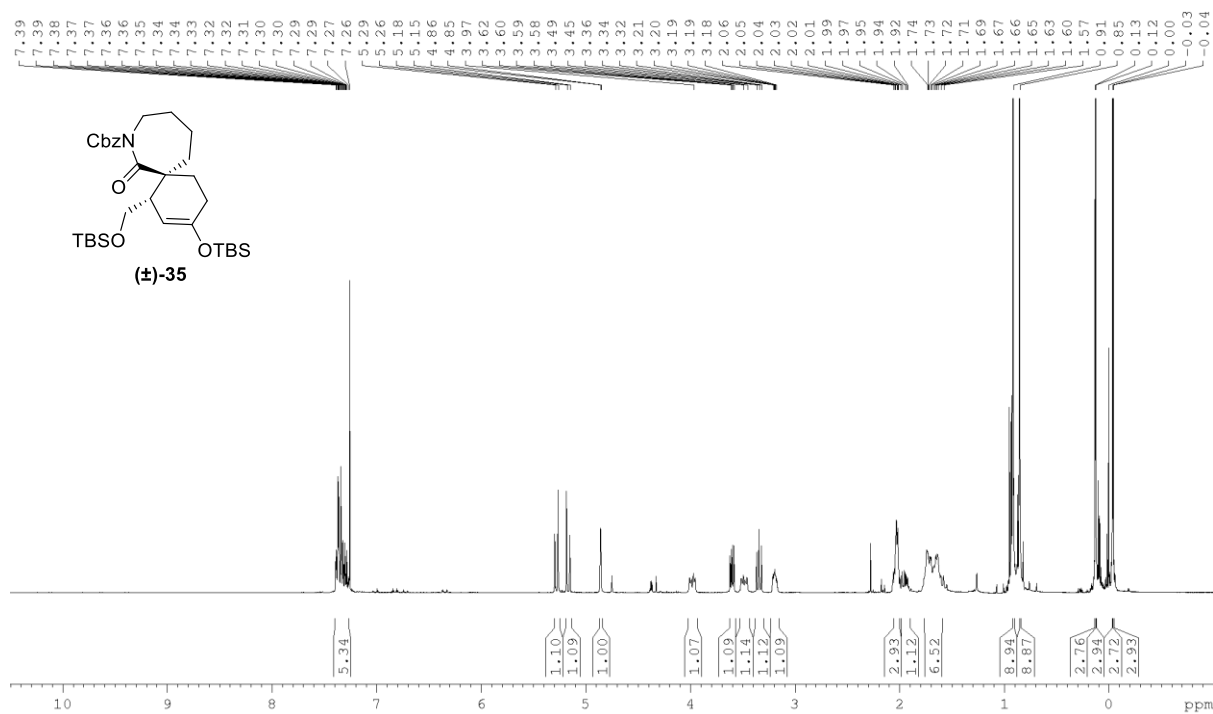

$^{13}\text{C}$  NMR (100 MHz,  $\text{CDCl}_3$ )

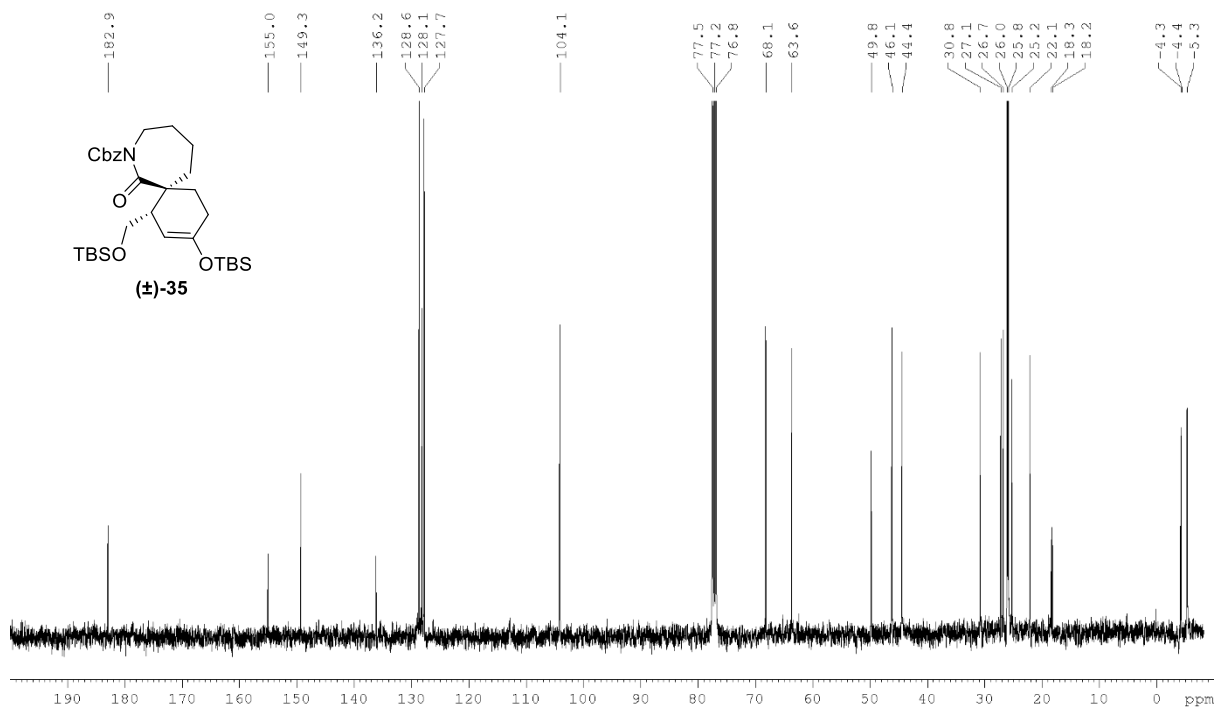



# Cycloadduct ( $\pm$ )-36

$^1\text{H}$  NMR (400 MHz,  $\text{CDCl}_3$ )

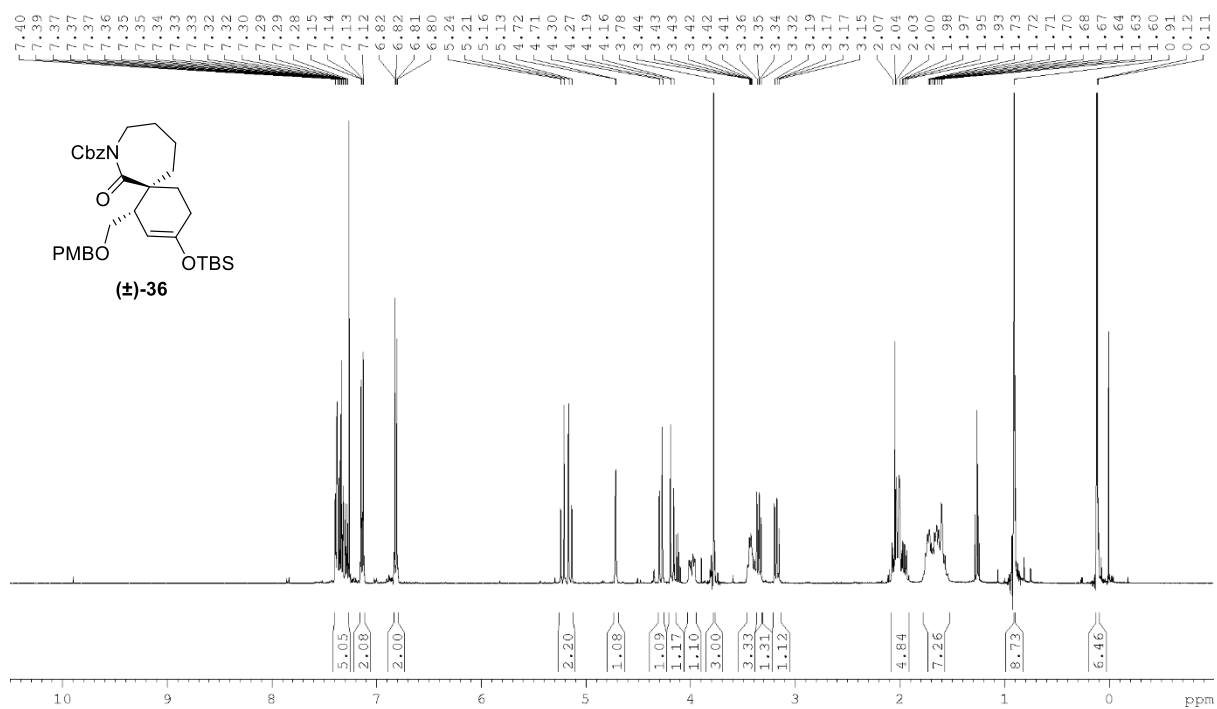

$^{13}\text{C}$  NMR (100 MHz,  $\text{CDCl}_3$ )

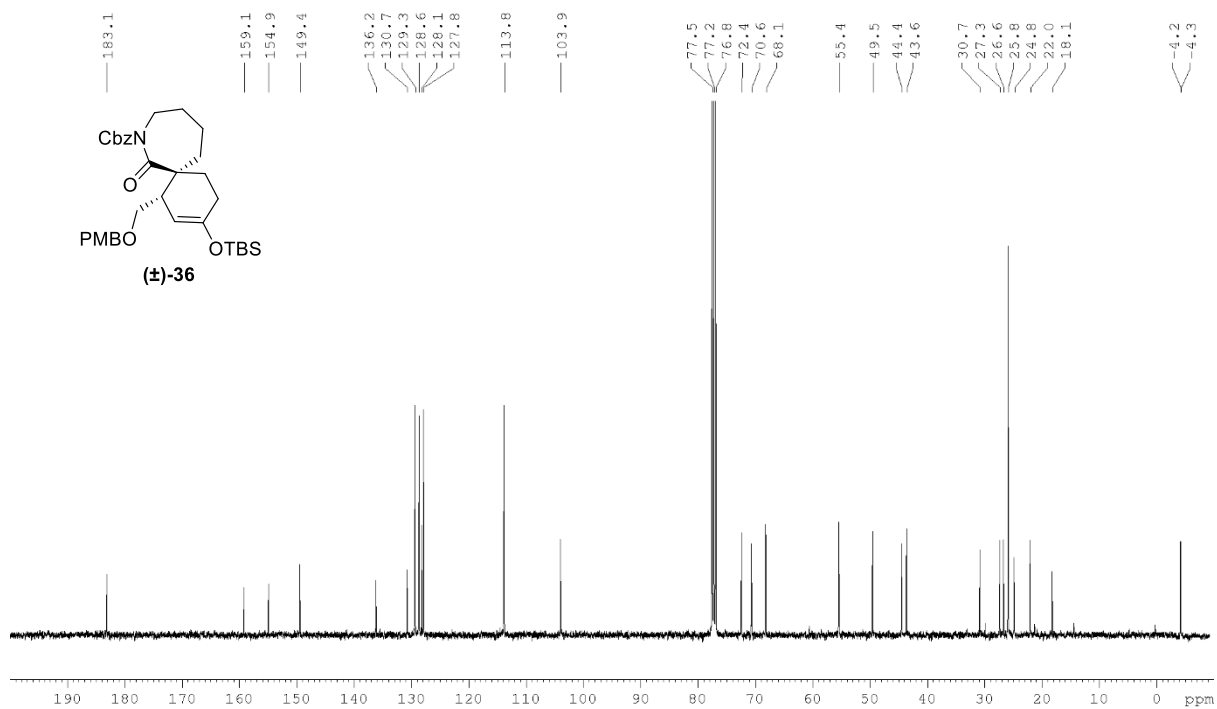

# Cycloadduct ( $\pm$ )-37

$^1\text{H NMR}$  (400 MHz,  $\text{CDCl}_3$ )

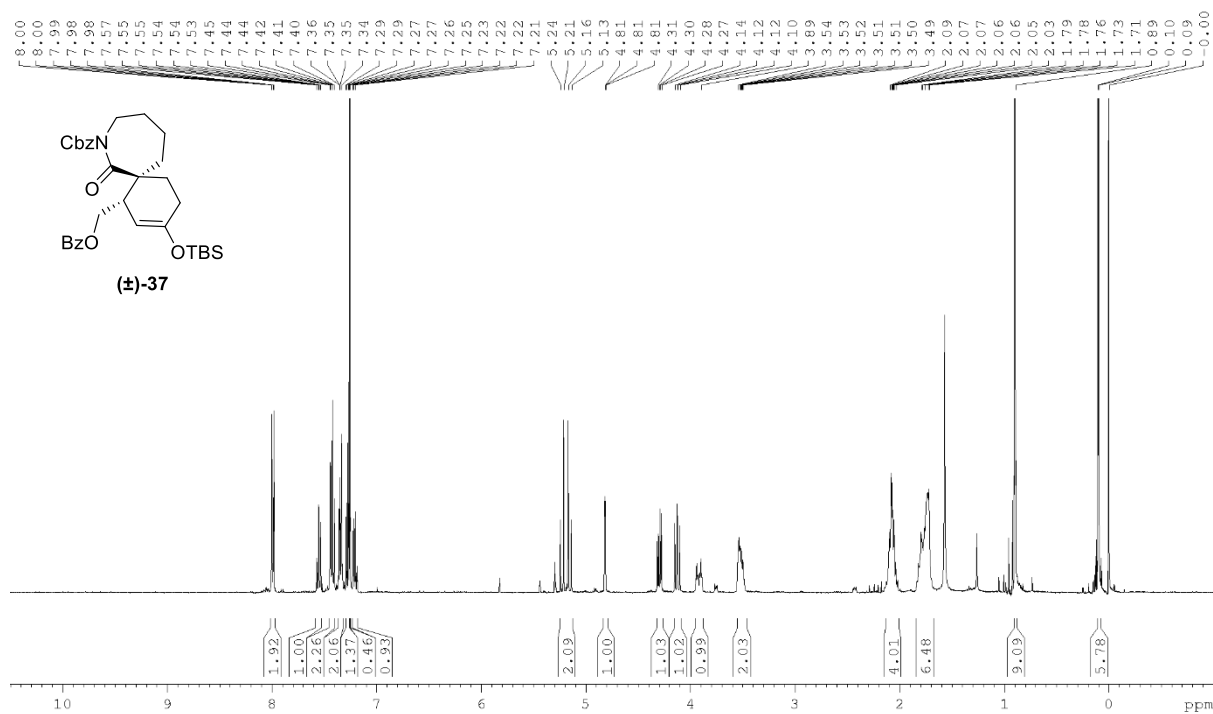

$^{13}\text{C NMR}$  (100 MHz,  $\text{CDCl}_3$ )

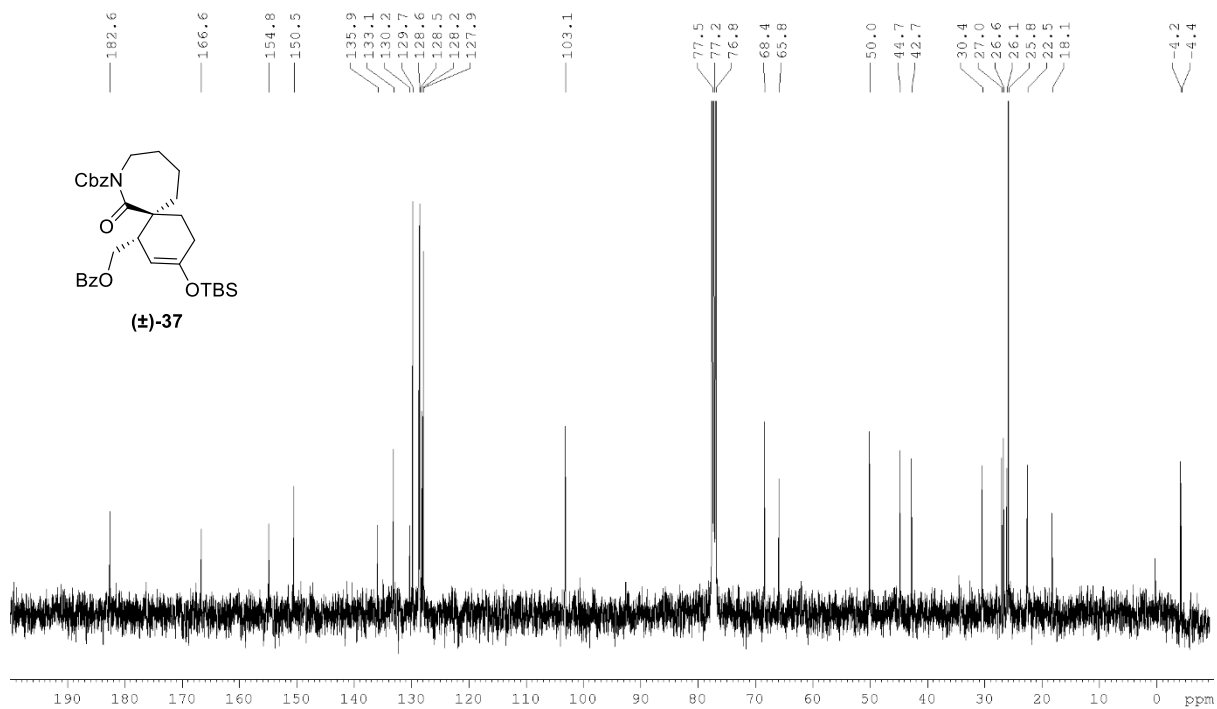

# Cycloadduct ( $\pm$ )-39

$^1\text{H}$  NMR (400 MHz,  $\text{CDCl}_3$ )

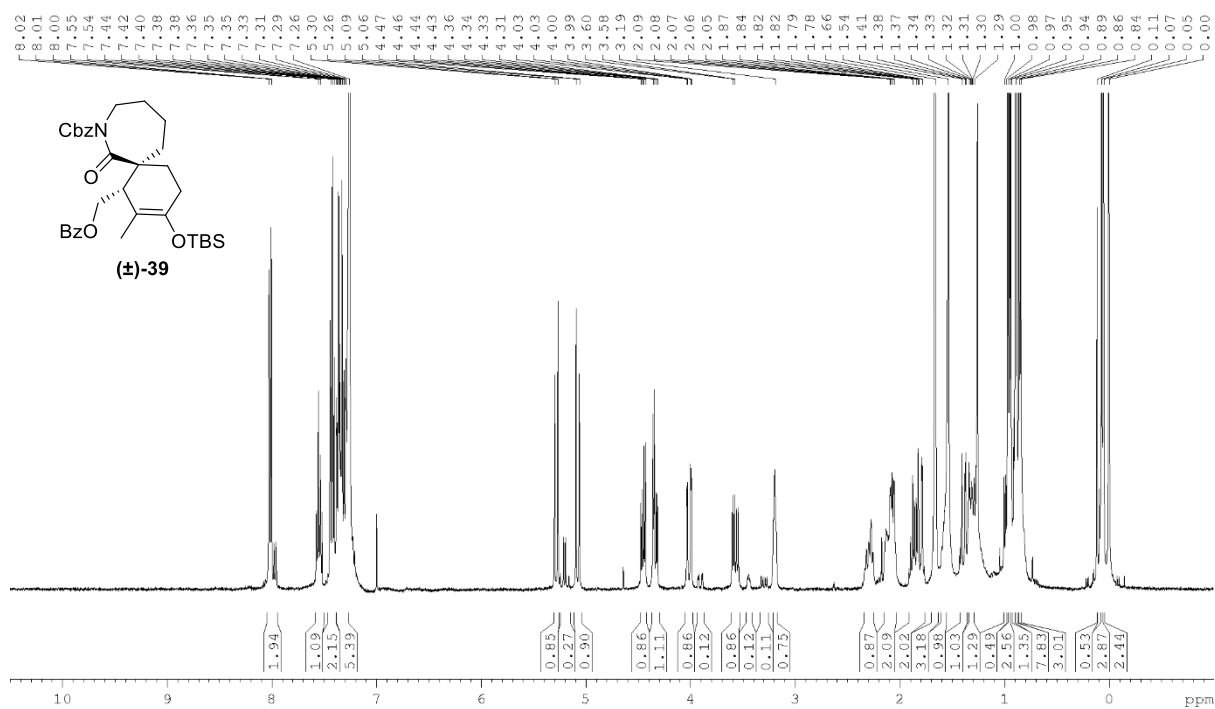

$^{13}\text{C}$  NMR (100 MHz,  $\text{CDCl}_3$ )

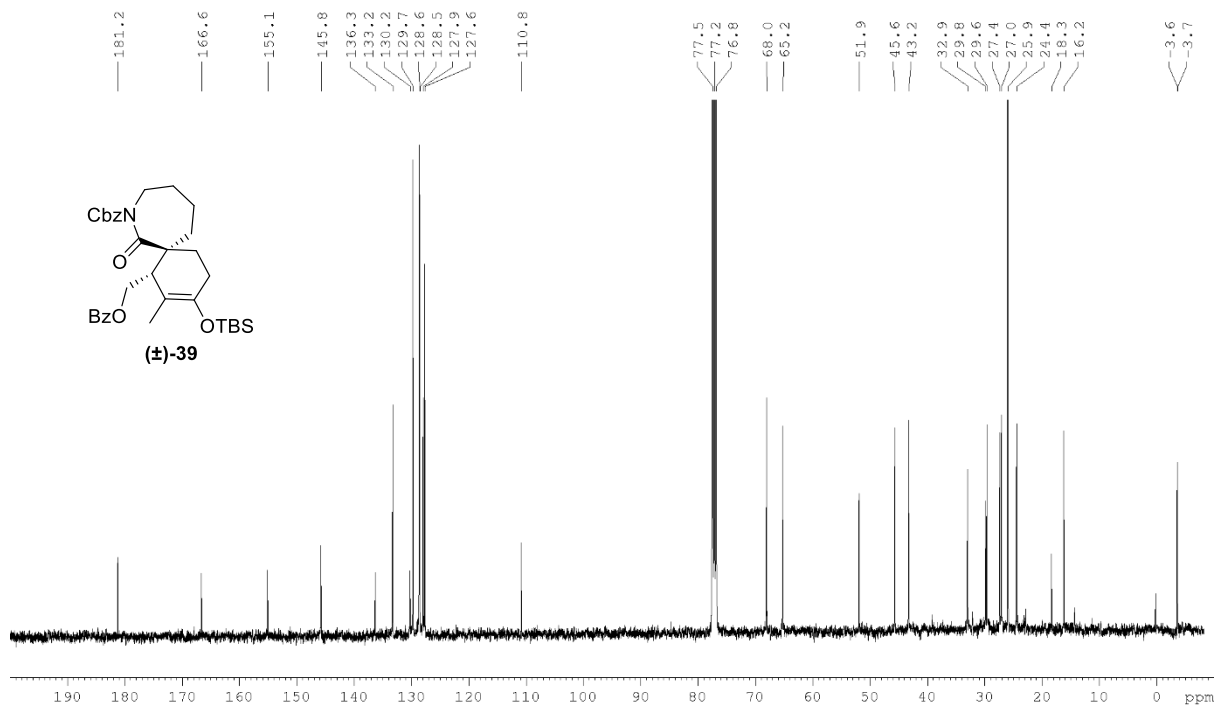

# Cycloadducts 16a and 16b

$^1\text{H NMR}$  (400 MHz,  $\text{CDCl}_3$ )

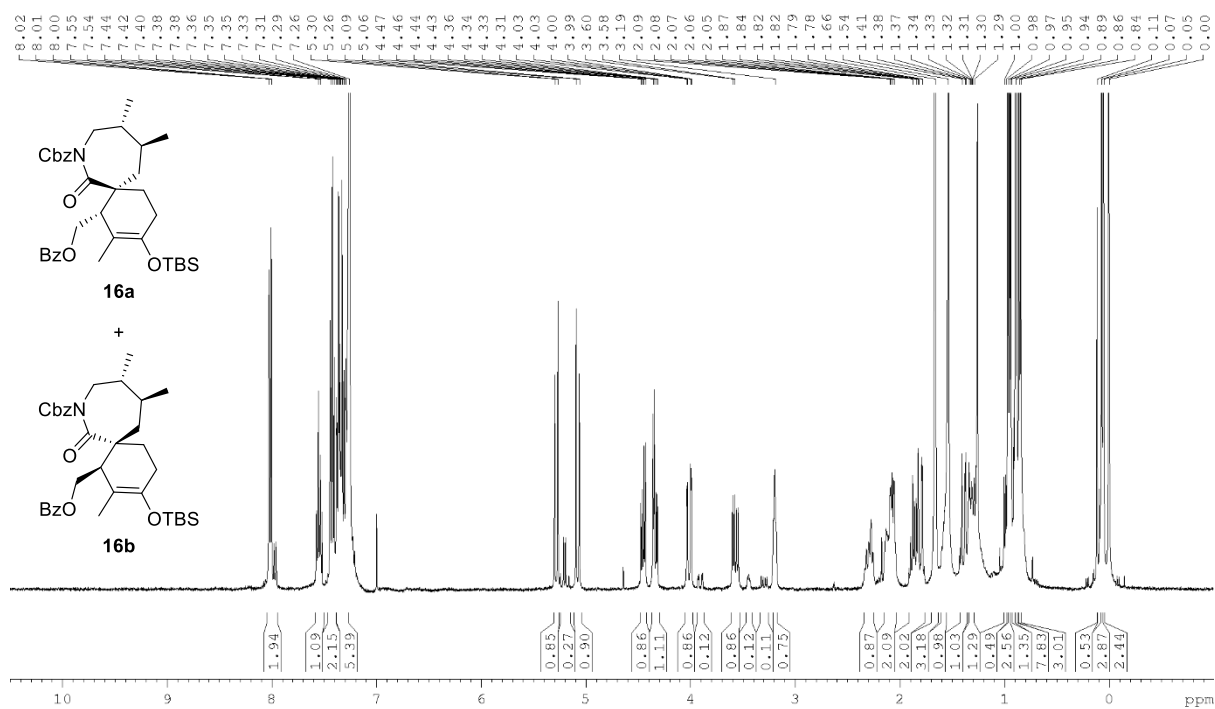

$^{13}\text{C NMR}$  (100 MHz,  $\text{CDCl}_3$ )

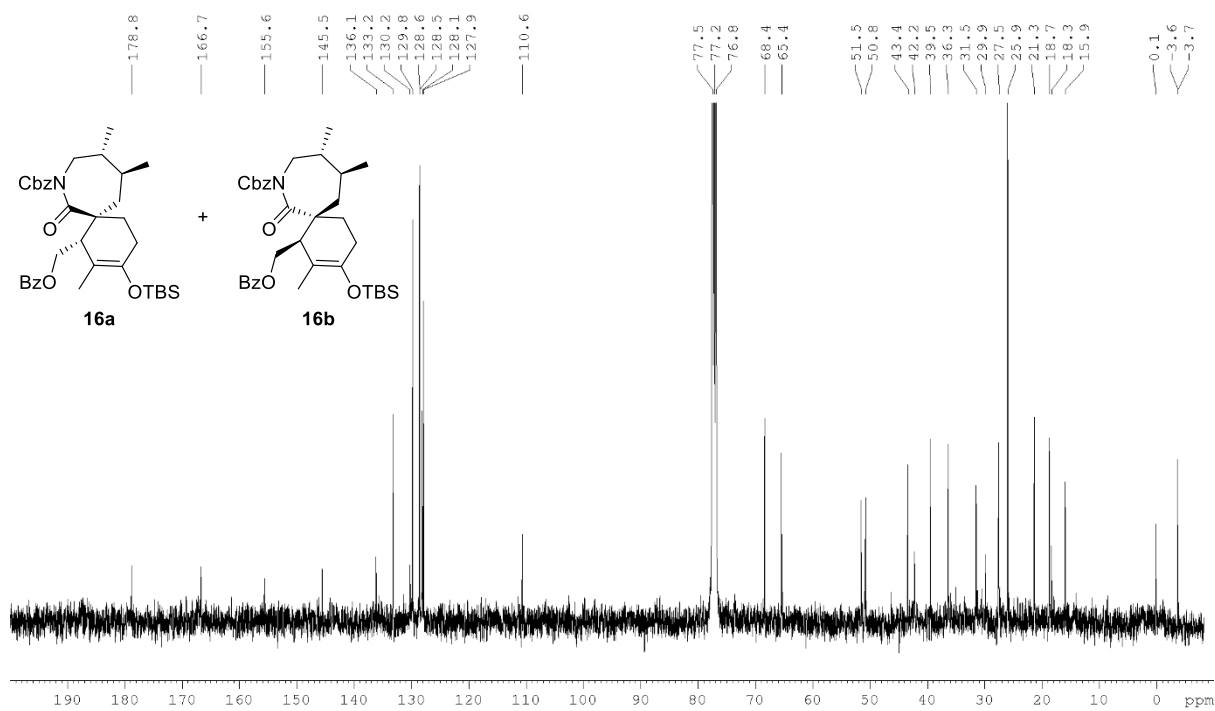

## Key NOESY correlations of Cycloadduct ( $\pm$ )-30

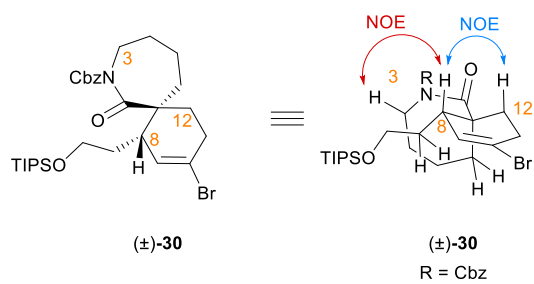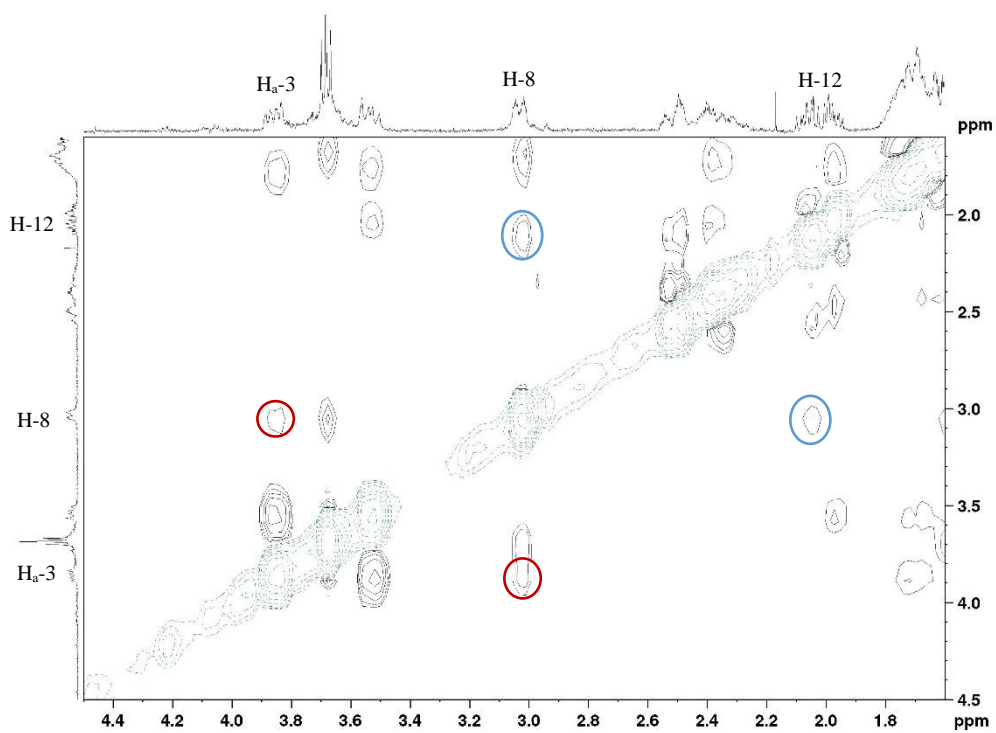

## Key NOESY correlations of Cycloadduct ( $\pm$ )-31

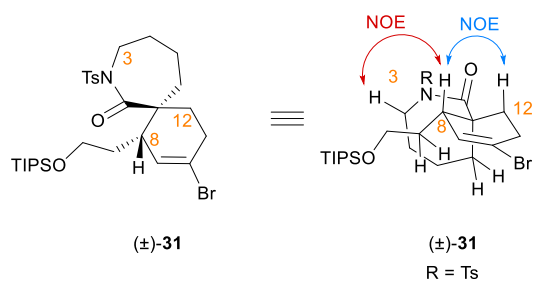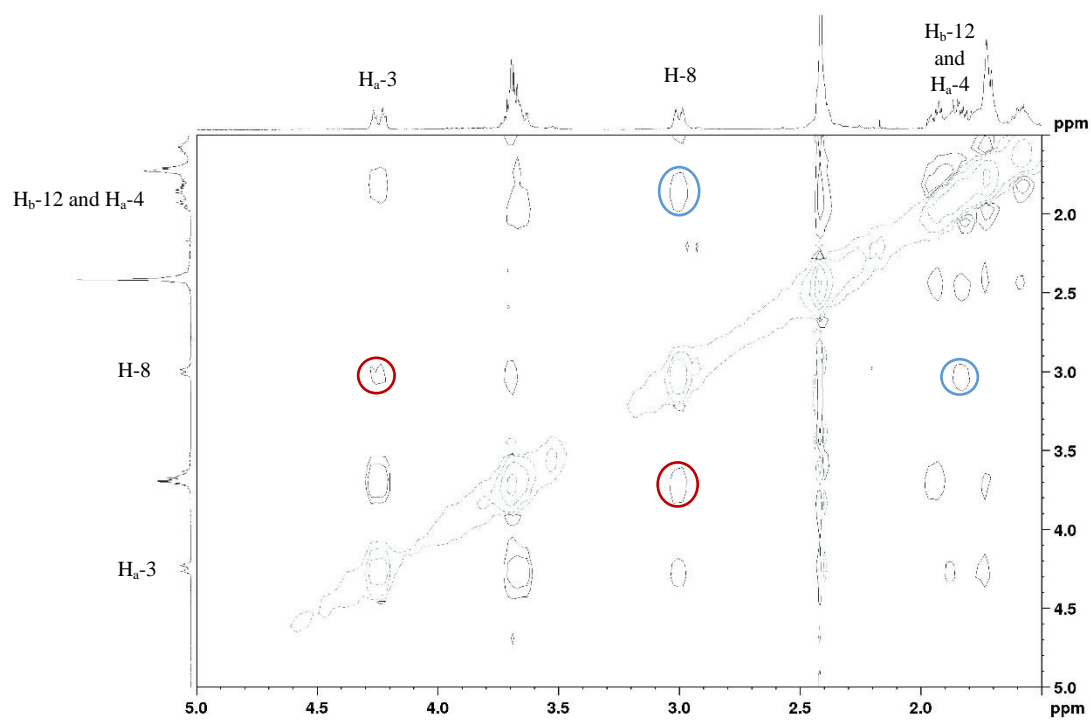

## Key NOESY correlations of Cycloadduct ( $\pm$ )-35

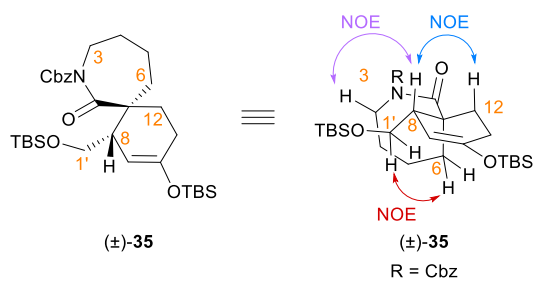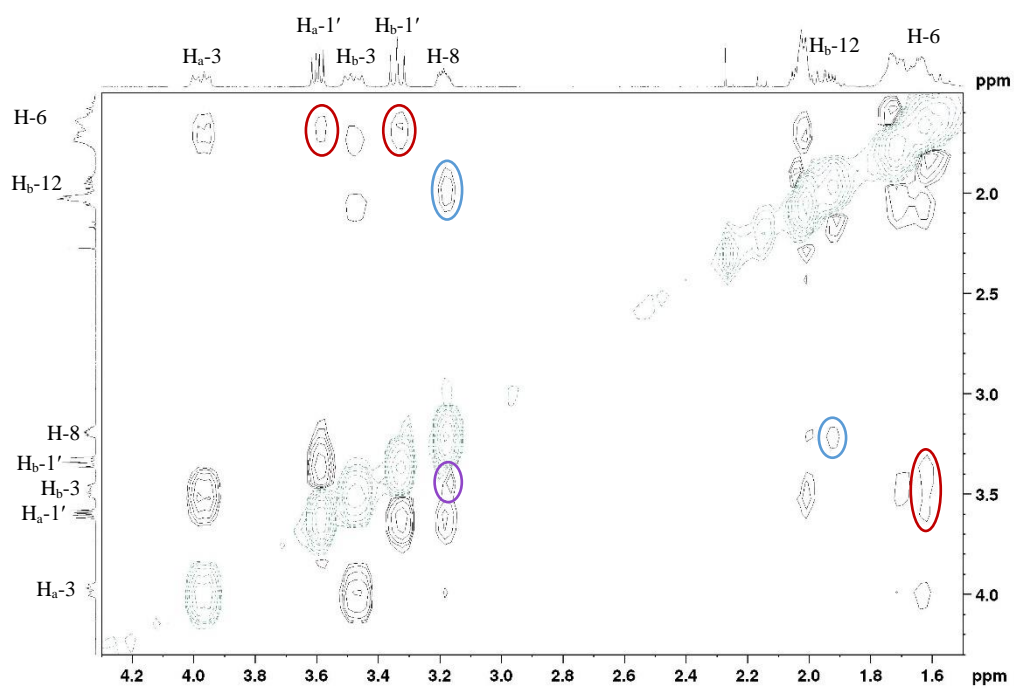

## Key NOESY correlations of Cycloadduct ( $\pm$ )-36

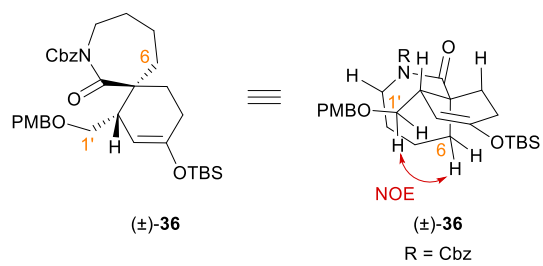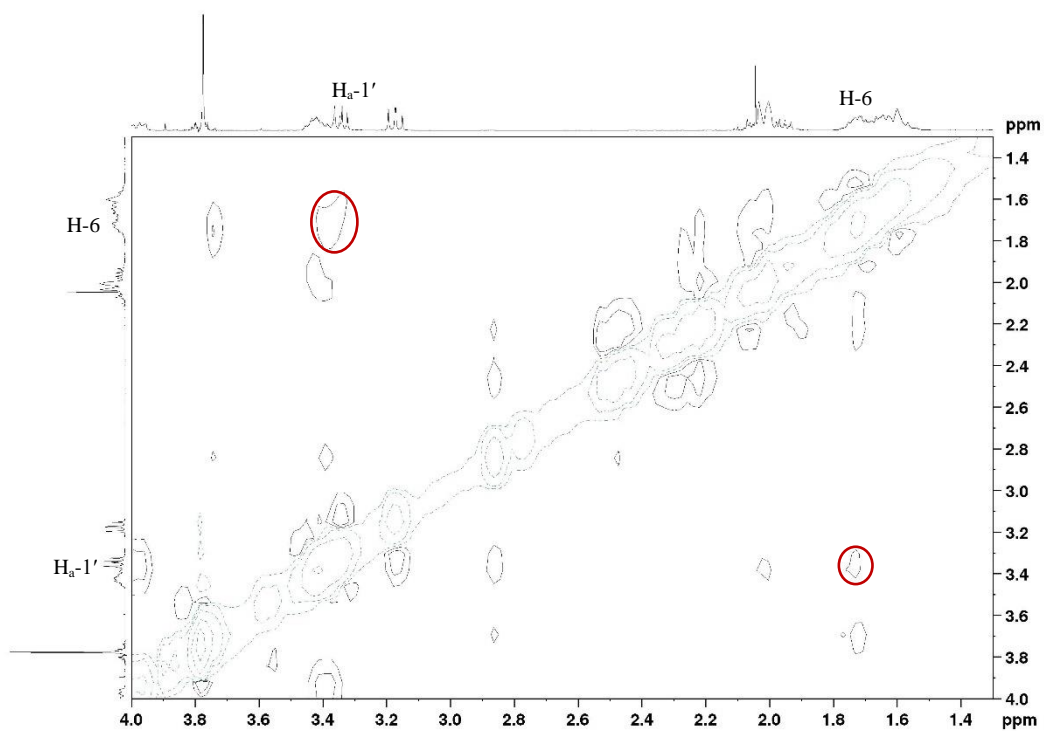



## Key NOESY correlations of Cycloadduct ( $\pm$ )-37

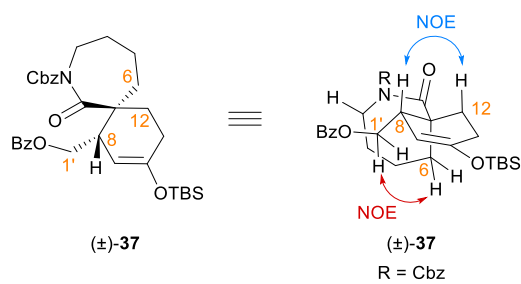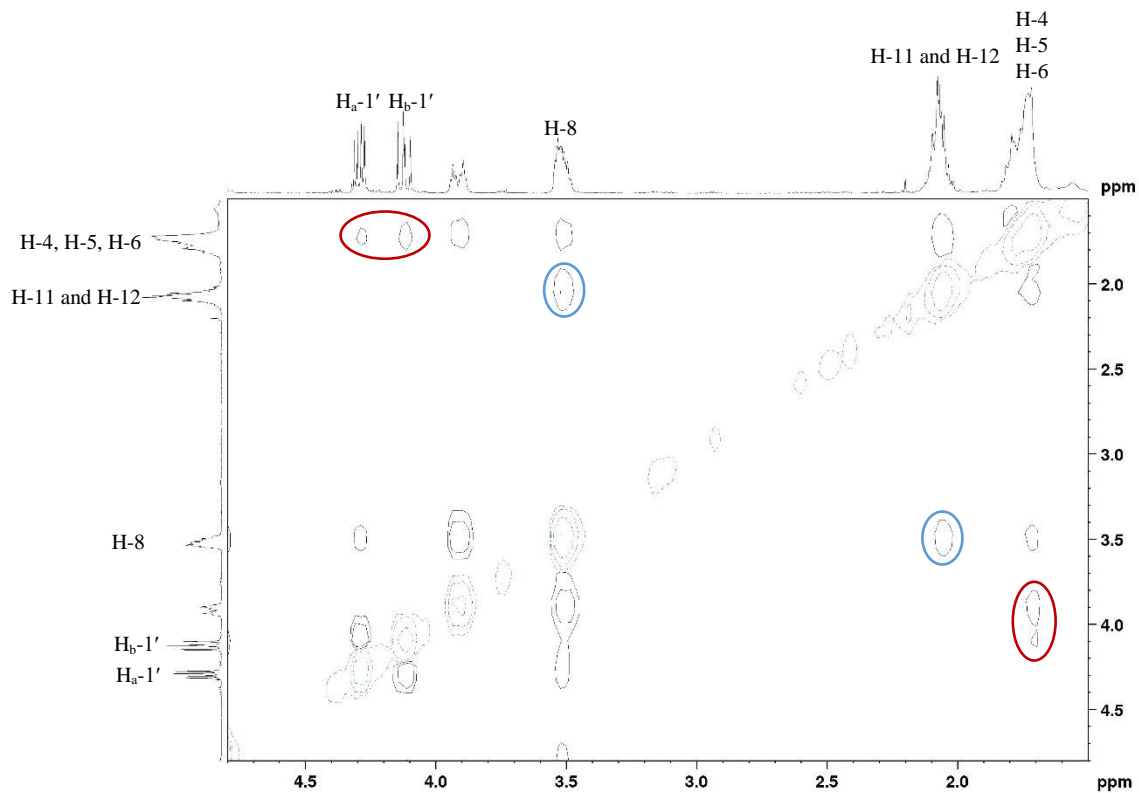

## Key NOESY correlations of Cycloadduct ( $\pm$ )-39

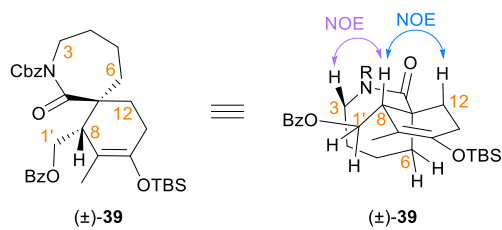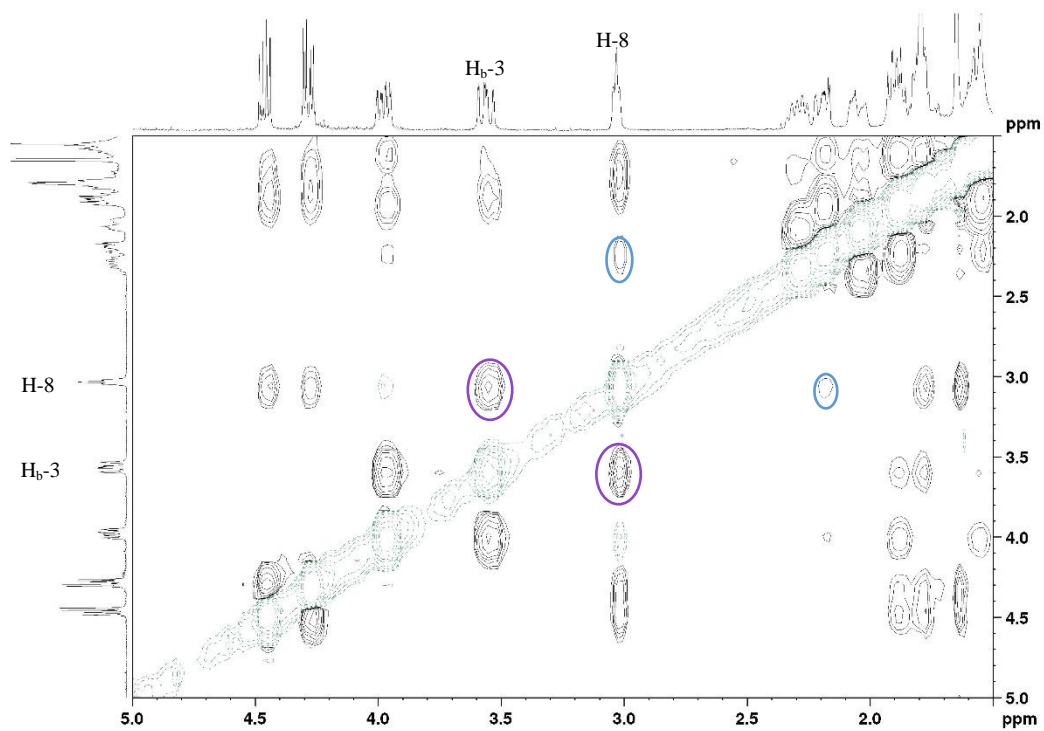

## Key NOESY correlations of Cycloadduct 16a

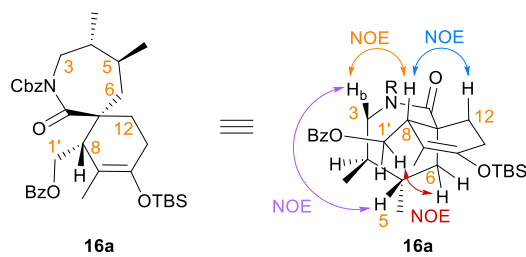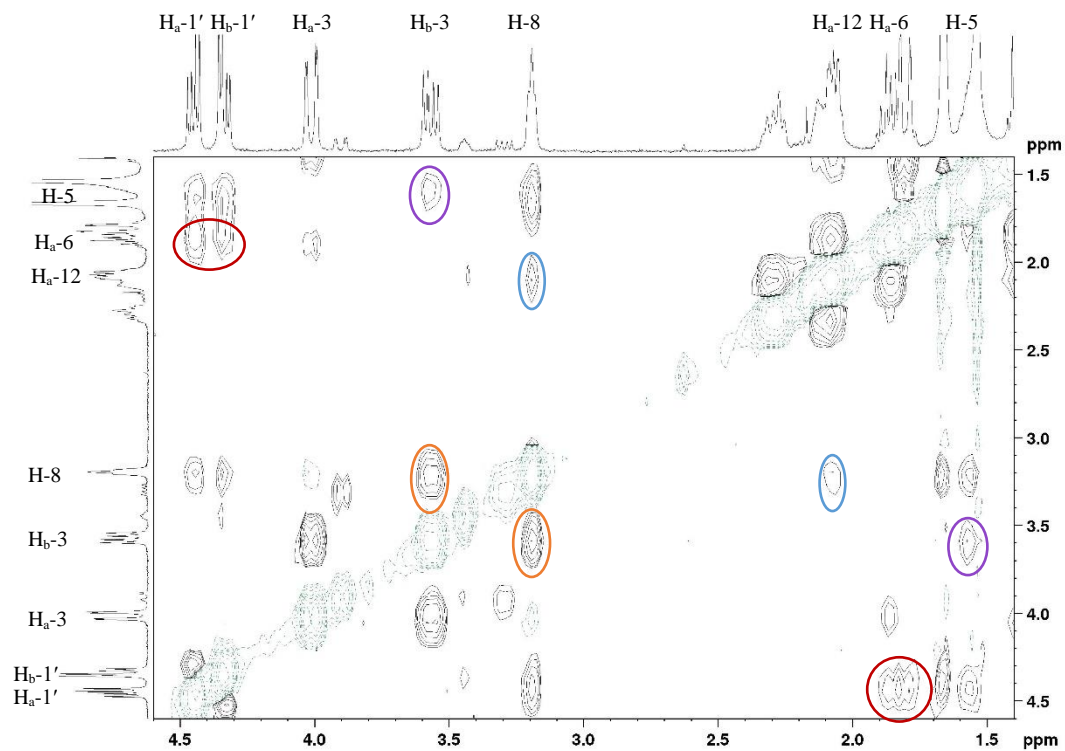

## Key NOESY correlations of Cycloadduct 16b

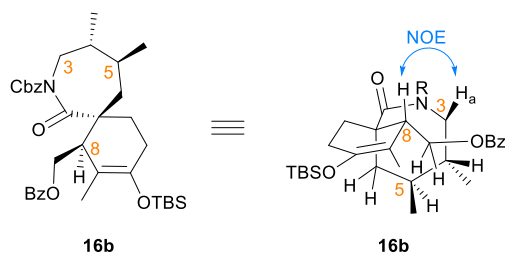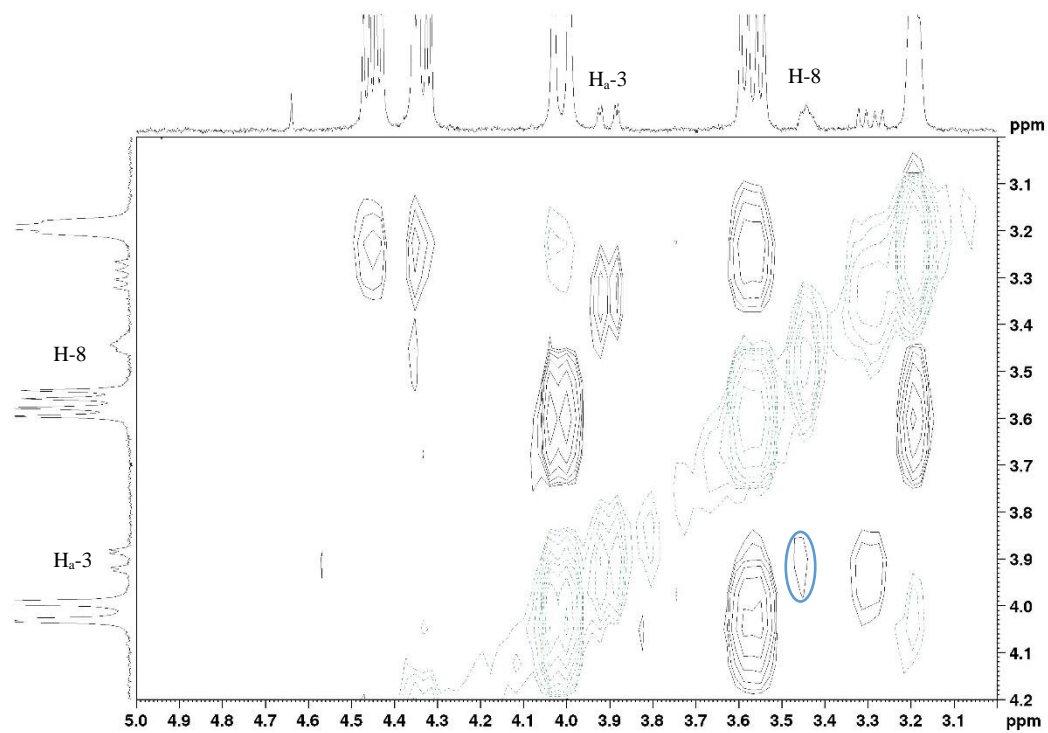

## Crystal Structure of Cycloadduct ( $\pm$ )-**35** – CCDC 2205771

**Crystallisation:** Single crystals of cycloadduct ( $\pm$ )-**35** were obtained by slow recrystallisation of a solution of the compound in Pet. Ether:Et<sub>2</sub>O (9:1).

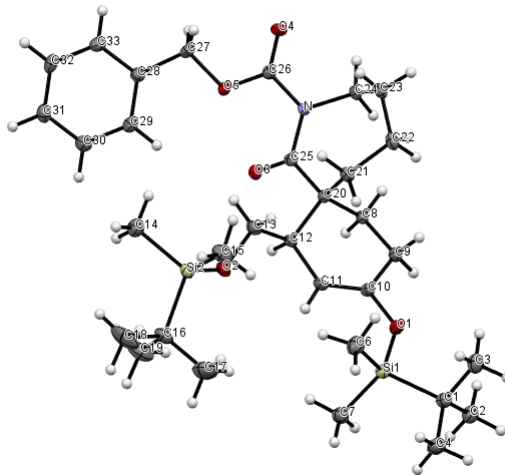

**Figure S1.** ORTEP diagram drawn with 50% ellipsoid probability of the crystal structure of cycloadduct ( $\pm$ )-**35**

**Table S3.** Crystal data and structure refinement details for cycloadduct ( $\pm$ )-**35**

|                                     |                                                                 |
|-------------------------------------|-----------------------------------------------------------------|
| Empirical formula                   | C <sub>32</sub> H <sub>53</sub> NO <sub>5</sub> Si <sub>2</sub> |
| Formula weight                      | 587.93                                                          |
| Temperature (K)                     | 104.3(8)                                                        |
| Wavelength (Å)                      | 1.54184                                                         |
| Crystal system                      | Monoclinic                                                      |
| Space group                         | P 21                                                            |
| a (Å)                               | 8.01200(10)                                                     |
| b (Å)                               | 11.4236(2)                                                      |
| c (Å)                               | 18.6445(3)                                                      |
| $\alpha$ (°)                        | 90.000                                                          |
| $\beta$ (°)                         | 101.794(2)                                                      |
| $\gamma$ (°)                        | 90.000                                                          |
| V (Å <sup>3</sup> )                 | 1670.43(5)                                                      |
| Z                                   | 2                                                               |
| D <sub>c</sub> (Mg/m <sup>3</sup> ) | 1.169                                                           |
| F(000)                              | 640                                                             |
| $\mu$ (mm <sup>-1</sup> )           | 1.262                                                           |
| $\theta_{max}$ (°)                  | 68.250                                                          |
| Total reflections                   | 21914                                                           |
| Unique reflections                  | 6128                                                            |
| Reflections [ $I > 2\sigma(I)$ ]    | 6128                                                            |
| Parameters                          | 372                                                             |
| $R_{int}$                           | 0.0477                                                          |
| Goodness-of-fit on F <sup>2</sup>   | 1.037                                                           |
| $R$ [ $F_2 > 2\sigma(F_2)$ ]        | 0.0311                                                          |
| $wR$ ( $F_2$ , all data)            | 0.0747                                                          |

## References

- [1] H. Choi, H. J. Shirley, H. R. M. Aitken, T. Schulte, T. Söhnel, P. A. Hume, M. A. Brimble, D. P. Furkert, *Org. Lett.* **2020**, *22*, 1022–1027.
- [2] J. A. Lafontaine, D. P. Provencal, C. Gardelli, J. W. Leahy, *J. Org. Chem.* **2003**, *68*, 4215–4234.
- [3] F. Yang, J. J. Newsome, D. P. Curran, *J. Am. Chem. Soc.* **2006**, *128*, 14200–14205.
- [4] J. L. Freeman, M. A. Brimble, D. P. Furkert, *Org. Biomol. Chem.* **2019**, *17*, 2705–2714.
- [5] Z. Wang, N. Krogsgaard-Larsen, B. Daniels, D. P. Furkert, M. A. Brimble, *J. Org. Chem.* **2016**, *81*, 10366–10375.
